# Supplementary material for: Trends, composition and distribution of nurse workforce in China: a secondary analysis of national data from 2003 to 2018
Source: PubMed Central journal article supplement — BMJ Open. 2021 Oct 27;11(10):e047348. doi: 10.1136/bmjopen-2020-047348 (PMC8552175; doi:10.1136/bmjopen-2020-047348), 2021-10-27
Supplement: bmjopen-2020-047348.draft_revisions.pdf [file bmjopen-2020-047348.draft_revisions.pdf]

# BMJ Open

BMJ Open is committed to open peer review. As part of this commitment we make the peer review history of every article we publish publicly available.

When an article is published we post the peer reviewers' comments and the authors' responses online. We also post the versions of the paper that were used during peer review. These are the versions that the peer review comments apply to.

The versions of the paper that follow are the versions that were submitted during the peer review process. They are not the versions of record or the final published versions. They should not be cited or distributed as the published version of this manuscript.

BMJ Open is an open access journal and the full, final, typeset and author-corrected version of record of the manuscript is available on our site with no access controls, subscription charges or pay-per-view fees (<http://bmjopen.bmj.com>).

If you have any questions on BMJ Open's open peer review process please email [info.bmjopen@bmj.com](mailto:info.bmjopen@bmj.com)

# BMJ Open

## Trends, Composition, and Distribution of Nurse Workforce in China: An Analysis from 2003 to 2018

|                               |                                                                                                                                                                                                                                                                                                                                                                                                                                                                                                                                                                                                      |
|-------------------------------|------------------------------------------------------------------------------------------------------------------------------------------------------------------------------------------------------------------------------------------------------------------------------------------------------------------------------------------------------------------------------------------------------------------------------------------------------------------------------------------------------------------------------------------------------------------------------------------------------|
| Journal:                      | <i>BMJ Open</i>                                                                                                                                                                                                                                                                                                                                                                                                                                                                                                                                                                                      |
| Manuscript ID                 | bmjopen-2020-047348                                                                                                                                                                                                                                                                                                                                                                                                                                                                                                                                                                                  |
| Article Type:                 | Original research                                                                                                                                                                                                                                                                                                                                                                                                                                                                                                                                                                                    |
| Date Submitted by the Author: | 25-Nov-2020                                                                                                                                                                                                                                                                                                                                                                                                                                                                                                                                                                                          |
| Complete List of Authors:     | Lu, Han; Peking University School of Nursing<br>Hou, Luoya; Peking University School of Nursing<br>Zhou, Weijiao; University of Michigan School of Nursing<br>Shen, Liqiong; Wuhan University Zhongnan Hospital<br>Jin, Shida; Peking University School of Nursing<br>Wang, Mengqi; Peking University School of Nursing<br>Cong, Xiaomei; University of Connecticut School of Nursing,<br>Jin, Xiaoyan; Peking University School of Nursing<br>Dou, Dou; National Natural Science Foundation of China, Forth<br>Department of Health Sciences<br>Shang, Shaomei; Peking University School of Nursing |
| Keywords:                     | Health policy < HEALTH SERVICES ADMINISTRATION & MANAGEMENT, MEDICAL EDUCATION & TRAINING, Organisation of health services < HEALTH SERVICES ADMINISTRATION & MANAGEMENT, Human resource management < HEALTH SERVICES ADMINISTRATION & MANAGEMENT                                                                                                                                                                                                                                                                                                                                                    |
|                               |                                                                                                                                                                                                                                                                                                                                                                                                                                                                                                                                                                                                      |

SCHOLARONE™  
Manuscripts

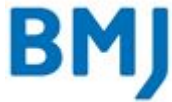

I, the Submitting Author has the right to grant and does grant on behalf of all authors of the Work (as defined in the below author licence), an exclusive licence and/or a non-exclusive licence for contributions from authors who are: i) UK Crown employees; ii) where BMJ has agreed a CC-BY licence shall apply, and/or iii) in accordance with the terms applicable for US Federal Government officers or employees acting as part of their official duties; on a worldwide, perpetual, irrevocable, royalty-free basis to BMJ Publishing Group Ltd ("BMJ") its licensees and where the relevant Journal is co-owned by BMJ to the co-owners of the Journal, to publish the Work in this journal and any other BMJ products and to exploit all rights, as set out in our [licence](#).

The Submitting Author accepts and understands that any supply made under these terms is made by BMJ to the Submitting Author unless you are acting as an employee on behalf of your employer or a postgraduate student of an affiliated institution which is paying any applicable article publishing charge ("APC") for Open Access articles. Where the Submitting Author wishes to make the Work available on an Open Access basis (and intends to pay the relevant APC), the terms of reuse of such Open Access shall be governed by a Creative Commons licence – details of these licences and which [Creative Commons](#) licence will apply to this Work are set out in our licence referred to above.

Other than as permitted in any relevant BMJ Author's Self Archiving Policies, I confirm this Work has not been accepted for publication elsewhere, is not being considered for publication elsewhere and does not duplicate material already published. I confirm all authors consent to publication of this Work and authorise the granting of this licence.

**Trends, Composition, and Distribution of Nurse Workforce in China: An Analysis from 2003 to 2018**

Han Lu <sup>\*a</sup>, Luoya Hou<sup>\*a</sup>, Weijiao Zhou<sup>b</sup>, Liqiong Shen<sup>c</sup>, Shida Jin<sup>a</sup>, Mengqi Wang<sup>a</sup>, Shaomei Shang<sup>a</sup>,  
Xiaomei Cong<sup>d</sup>, Xiaoyan Jin<sup>a</sup>, Dou Dou<sup>c</sup>

<sup>a</sup> Peking University School of Nursing, 38 Xueyuan Rd., Haidian Dist., Beijing, China

<sup>b</sup> University of Michigan School of Nursing, 426 N. Ingalls St. Ann Arbor, MI, USA

<sup>c</sup> Zhongnan Hospital of Wuhan University, 169 Donghu Rd., Wuchang Dist., Wuhan, China

<sup>d</sup> University of Connecticut School of Nursing, 231 Glenbrook Rd., Unit 4026 University of Connecticut Storrs, CT, USA

<sup>e</sup> Department of Health Sciences, National Natural Science Foundation of China, #83 Shuangqing Rd., Beijing, China

\*These authors contributed equally to this work

Corresponding author: Shaomei Shang, Xiaomei Cong, Xiaoyan Jin, Dou Dou

Tel: +86 82801611

E-mail address: shangshaomei@126.com (S. Shang)

**[Authors]:**

1. Han Lu, first author, BS, PhD student, Peking University School of Nursing

Tel: 18811559502

Address: 38 Xueyuan Rd., Haidian Dist., Beijing, China

Email: [luhanfish@163.com](mailto:luhanfish@163.com)

2. Luoya Hou, co-first author, BS, PhD student, Peking University School of Nursing

Tel: 18801238295

Address: 38 Xueyuan Rd., Haidian Dist., Beijing, China

Email: [houluoya@bjmu.edu.cn](mailto:houluoya@bjmu.edu.cn)

3. Weijiao Zhou, MSc, PhD student, University of Michigan School of Nursing

Address: 426 N. Ingalls St. Ann Arbor, MI, USA

Email: [weijiaoz@umich.edu](mailto:weijiaoz@umich.edu)

4. Liqiong Shen, MSc, Zhongnan Hospital of Wuhan University

Address: 169 Donghu Rd., Wuchang Dist., Wuhan, China

Email: [m18510413325@163.com](mailto:m18510413325@163.com)

5. Shida Jin, BS, Master degree student, Peking University School of Nursing

Address: 38 Xueyuan Rd., Haidian Dist., Beijing, China

Email: [jinshida@bjmu.edu.cn](mailto:jinshida@bjmu.edu.cn)

6. Mengqi Wang, BS, Master degree student, Peking University School of Nursing

Address: 38 Xueyuan Rd., Haidian Dist., Beijing, China

Email: [1911210184@bjmu.edu.cn](mailto:1911210184@bjmu.edu.cn)

7. Shaomei Shang, first corresponding author, MSc, Professor & Dean, Peking University School of Nursing

Tel: 13911091935

1  
2  
3 Address: 38 Xueyuan Rd., Haidian Dist., Beijing, China

4 Email: [shangshaomei@126.com](mailto:shangshaomei@126.com)

5  
6 8. Xiaomei Cong, second corresponding author, PhD, Professor & Associate Dean for Research and  
7 Scholarship, University of Connecticut School of Nursing; Director, Nursing Biobehavioral Research  
8 Laboratory (BBL)

9 Address: 231 Glenbrook Rd., Unit 4026 University of Connecticut Storrs, CT, USA

10 Email: [xiaomei.cong@uconn.edu](mailto:xiaomei.cong@uconn.edu)

11  
12  
13 9. Xiaoyan Jin, third corresponding author, MSc, Associate professor, Peking University School of  
14 Nursing

15 Address: 38 Xueyuan Rd., Haidian Dist., Beijing, China

16 Email: [jxybmu@sina.com](mailto:jxybmu@sina.com)

17  
18 10. Dou Dou, fourth corresponding author, PhD, Associate professor, Forth Department of Health  
19 Sciences, National Natural Science Foundation of China

20 Address: 83 Shuangqing Rd., Beijing, China

21 Email: [doudou@nsfc.gov.cn](mailto:doudou@nsfc.gov.cn)

22  
23  
24  
25 **[Number of words]:**

26 A total of 3,996 words in this manuscript.

27  
28  
29  
30 **[Keywords]:** Health Workforce; Nurses; trends; supply and distribution; Healthcare Disparities

## Trends, Composition, and Distribution of Nurse Workforce in China: An Analysis from 2003 to 2018

### ABSTRACT

**Objectives** Given the increased aging population and frequent epidemic challenges, it is vital to have the nurse workforce of sufficient quantity and quality in achieving population health. The objective of this study was to demonstrate the composition, distribution, and trends of the nurse workforce in China, from 2003 to 2018.

**Design** Secondary analysis using national public datasets in China from 2003 to 2018.

**Setting/Participants** National population, nurse workforce, and physician workforce.

**Primary and secondary outcome measures** Frequency and proportion were used to demonstrate 1) the longitudinal growth of nurse workforce; 2) the diversity of nurse workforce in gender, age, work experience, and education level; 3) the distribution of nurse workforce among provinces, rural-urban areas, and hospital/community settings. The Gini coefficient and Theil L index were chosen to calculate the inequality of nurse distribution.

**Results** The total number of nurses increased from 1.3 million to 4.1 million (2.2 times) and the density increased from 1 to 2.94 per 1000 population (1.9 times) during the past 15 years in China. The nurses to physician ratio changed from 0.65:1 to 1.14:1 over 2003-2018. The majority of the nurse workforce was female, under 35 years old, with less than 30 years of work experience and with an associate's degree. Nurse distribution inequality across Chinese provinces was decreasing, whereas the proportion of nurses employed in the primary care settings and rural areas remained low relatively.

**Conclusion** These significant changes in China's nurse workforce might be associated with policy reformations. Our study suggests current features in the nurse workforce and can be used to strengthen health services.

### Strengths and limitations of this study

1. This study presents the supply, trends, the demographic composition, the distribution across urban-rural regions and working settings, and the distribution equality of the Chinese nurse workforce over the past 15 years.
2. Data are derived from the national reports of China.
3. Findings could be used for providing robust policy prescriptions, healthcare administration, education, and further research to strengthen the nurse workforce.
4. Some nurse composition data are inadequately updated before 2005, and the data collection methods have been constantly modified and updated in the national surveys.

## INTRODUCTION

Nursing is the largest profession in the current health care workforce and healthcare service systems in China and worldwide. Nursing has been playing a central role in the health delivery system and providing a full range of responsibilities in health promotion, prevention, treatment, and rehabilitation. It is vital to have the nurse workforce of sufficient capacity, capability, and quality in achieving population health and universal health coverage. A higher proportion of nurses, especially nurses with a higher education level in the health workforce is associated with better health outcomes.<sup>[2-5]</sup> As the aging population grows heavily globally, as well as the frequent public health emergencies in the past decades, there is an increasing need for safe and quality health care and nurse labor.<sup>[6-8]</sup>

World Health Organization (WHO) evidenced that despite significant progress, there is a growing mismatch between supply, need, and demand of the nurse workforce, resulting in staff shortages.<sup>[9]</sup> And WHO projected a significant growth (55%) of nurse workforce demand, leading to an aggregate number of 32.3 million nurses/midwives by 2030 based on current trends.<sup>[10]</sup> Even in the US, the nursing labor market continues to tighten with 45% of hospitals projecting to increase the number of nurse staff.<sup>[11]</sup>

As a middle-income country, China has 1.4 billion people, with the aging population accounts 17.9%.<sup>[12]</sup> People with chronic unfatal diseases keep growing, resulting in a heavy healthcare burden. Also, the distribution inequality of health resources across China cannot be ignored owing to the vast territory.<sup>[13]</sup> As a result, China has been facing big challenges regarding the nurse workforce.<sup>[14]</sup> Over the past two decades, the systems of medical education and health care have undergone unprecedented reform in China. In essence, the educational composition is the reflection of economic structure on the demand for human resources. In 2001, China joined the World Trade Organization, boosting the development of finance. Under that circumstance, with the development of medical science and reform of the healthcare system, the composition of nursing education should make corresponding changes. In 2003, the Ministry of Education combined with the other 5 Ministries defined nurses as a badly needed profession.<sup>[15]</sup> To achieve a higher nurse workforce supply, the government took this as a priority in healthcare management. In 2016, the main goals of Nursing development during the 13th Five-Year plan (2016-2020) are to achieve 4.45 million registered nurses and 3.14 nurses per thousand population by 2020.<sup>[16]</sup> As a result of that Five-Year, there were almost 4.43 million nurses in China in 2019, which increased by nearly one million from 2016.<sup>[17]</sup>

To date, the nurse workforce has improved a lot through the healthcare system and education reform in China. To our knowledge, the research is lacking to demonstrate the trends of the Chinese nurse workforce from a national perspective. This study analyzed the public data from the *China Health and Family Planning Statistical Yearbooks (CHFPSY)* and *China Statistical Yearbooks (CSY)*, illustrating the current nurse workforce and trends of over 2003 to 2018 in China. Specifically, we examined: 1) the growth of the nurse workforce, 2) the compositions of nurse workforce, including diversity in gender, age, work experience, education level, and 3) the distribution of nurse workforce across provinces, rural-urban and settings.

## METHODS

### Study design

A secondary analysis design was used in the study. Data was retrieved from the *CHFPSY* and *CSY*. The two databases are national annual survey reports reflecting the statistics of the healthcare workforce, population health status, and economic and social aspects of 31 provinces, autonomous regions, and municipalities in China (except for Hongkong, Macao, and Taiwan). The annual data from 2003 to 2018 from the *CHFPSY* (yearbooks of 2004-2019) were used to analyze the trends, composition and distribution of the nurse workforce over the past 15 years in China. We also used the *CSY* dataset to retrieve the population data of the national and province levels and calculated the equality/inequality of the distribution of nursing resources over 2003-2018 in China.

### Variables and Definitions

The primary variables and definitions included in the data analysis are described as the following, which are corresponding to the national survey datasets:

- 1) Nurses are those who have passed the nurse qualification examination and obtained a nursing qualification.
- 2) Physicians are those who pass a licensing examination and are registered at a healthy authority, including licensed physicians and licensed physician assistants.
- 3) Hospitals include general hospitals, affiliated hospitals of medical college, hospitals specialized in traditional Chinese medicine, hospitals of integrated traditional Chinese with western medicine, national hospitals, specialized hospitals, and nursing homes.
- 4) Primary care institutions include community health service centers, community health service stations, urban health centers, township health centers, village clinics, and outpatient departments and health centers.
- 5) The urban areas include municipalities and prefecture-level municipalities.
- 6) The rural areas include counties and county-level cities, townships, and villages.
- 7) The density of nurses is defined as the number of nurses per 1000 population.

### Data analysis

We downloaded the data from each of the yearbook datasets from 2004 to 2019, which correspond to the nurse and population data of 2003-2018. Excel software was used to merge, manage, and analyze the data. We used frequency and proportion to describe the composition and distributions of the nurse workforce throughout 2003-2018. The growth rate of nurses was calculated as the annual increased number of nurses divided by the total number of nurses of the previous year.

The Gini coefficient and Theil L index were identified by WHO to measure inequalities in the health workforce.<sup>[18]</sup> The Gini coefficient, an indicator for judging the degree of equality of distribution according to the Lorenz curve, is the most well-known indicator to measure the aggregate level of inequality and cannot explain the sources of inequality. We sorted the number of nurses per 1000 population in each province from small to large, using the cumulative population percentage as the abscissa and using the cumulative percentage of nurses as the ordinate to draw the Lorenz curve of the distribution of nurses across the country by population. The Gini coefficient is twice the area enclosed by the Lorenz curve and the perfect equality line.<sup>[19]</sup> If  $b_i$  = number of nurses in province unit  $i$  and  $c_i$  = number of people in province unit  $i$ , then the total number of nurses in the country is  $B = b_1 + b_2 + \dots + b_n$  and the total number of people in the country is  $C = c_1 + c_2 + \dots + c_n$ . If we value  $B_i = b_i/B$ ,  $C_i = c_i/C$ , then the



Gini coefficient  $G = 1 - \sum_{i=1}^I C_i (2 \sum_{i=1}^I B_i - B_i)$ . For further analysis, the Theil L index is the most attractive decomposition indicator, as it can be decomposed into two parts, between-groups ( $T_{1L}$ ) and within-groups ( $T_{2L}$ ), respectively. If  $j$  means urban or rural, then  $B_{ij}$  means the proportion of urban or rural nurses in province unit  $i$  in the total nurses, and  $C_{ij}$  means the proportion of the urban or rural population in province unit  $i$  in the total population. The decomposition of Thiel L index is as follows:

$$\text{Theil L} = T_{1L} + T_{2L} = \sum_{i=1}^I C_i \log \frac{C_i}{B_i} + \sum_{i=1}^I C_i \sum_{j=1}^J C_{ij} \log \frac{C_{ij}}{B_{ij}}$$

This study calculated the Gini coefficient and Theil L index to estimate the level of equality among nurse distribution and they were all weighted by the proportion of the population in each province in the total population as we explained in the formula. Besides, we calculated the ratio of the provincial Theil index to the total Theil index to represent the contribution rate of urban-rural differences to total differences.<sup>[20]</sup> The Gini coefficient and Theil L value from 0 to 1. The smaller value means fairer nurse distribution. We use Microsoft Excel 2013 to perform the above analyses.

### Patient and Public Involvement

A few nurses were involved in the reporting of our research and gave suggestions on the content and presentation of our research.

## RESULTS

### Growth of Nurse Workforce

Over 15 years, the nurse workforce has grown dramatically in China. At the end of 2018, the number of nurses reached over four million, which is 2.2 times more than that in 2003. The density of nurses increased by 1.9 times in the same period to reach about 2.94 nurses per 1000 population in 2018 (Table 1 and Figure 1). In Figure 2, the growth rates of the nurse workforce reveal three segments: an initial period of growth (2003-2006), a rapid growth period (2007-2013), and a period of stable growth (2014-2018). In the initial growth period, the growth rate dramatically increased from 1.6 percent in 2003 to 5.7 percent in 2006. The rapid growth period began in 2007 (9.3%), declined slightly in 2008 and 2011, then rose and reached the highest growth rate (11.5%) in 2013. Since 2014, there was a stable growth rate ranged from 7.7 percent to 8.5 percent.

Meanwhile, we also compared nurses vs. physician workforce in China (Table 1). In a long period of history before 2014, China had been with more physicians than nurses (Figure 1). With the rapid expansion of the nursing staff, the imbalance of nurses and physicians has been changed, and the ratio of nurses to physicians changed from 0.65:1 in 2003 to 1.14:1 in 2018.

**Table 1. Change of nurse and physician workforce from 2003 to 2018**

| Year | Nurses  |          | Physicians |          |
|------|---------|----------|------------|----------|
|      | Number  | Density* | Number     | Density* |
| 2003 | 1265959 | 1.00     | 1942364    | 1.54     |
| 2004 | 1308433 | 1.03     | 1999457    | 1.57     |
| 2005 | 1349589 | 1.03     | 2042135    | 1.56     |
| 2006 | 1426339 | 1.09     | 2099064    | 1.60     |
| 2007 | 1558822 | 1.18     | 2122925    | 1.61     |
| 2008 | 1678091 | 1.2      | 2201904    | 1.66     |
| 2009 | 1854818 | 1.39     | 2329206    | 1.75     |
| 2010 | 2048071 | 1.53     | 2413259    | 1.80     |
| 2011 | 2244020 | 1.66     | 2466094    | 1.82     |
| 2012 | 2496599 | 1.85     | 2616064    | 1.94     |
| 2013 | 2783121 | 2.04     | 2794754    | 2.04     |
| 2014 | 3004144 | 2.20     | 2892518    | 2.12     |
| 2015 | 3241469 | 2.37     | 3039135    | 2.22     |
| 2016 | 3507166 | 2.54     | 3191005    | 2.31     |
| 2017 | 3804021 | 2.74     | 3390034    | 2.44     |
| 2018 | 4098630 | 2.94     | 3607156    | 2.59     |

Note: \*Per 1000 population.

### Nurse Demographics and Characteristics

Table 2 presents nurse demographics and characteristics in overall health institutions, hospitals, and primary care institutions in China between 2005 and 2018 (no data available before 2005). The nurse workforce in China has been always predominately female, with the proportion of male nurses slightly increased from 1.7% in 2005 to 2.3% in 2018. Figure 3 shows the different composition of male nurses in hospitals vs. primary care institutions. From 2005 to 2018, male nurses working in primary care institutions dropped to 1.3%, while the proportion in hospitals steadily rose from 1.6 to 2.7%.

**Table 2. Demographics and characteristics of nurses from 2005 to 2018**

| Year                     | Overall health institutions |      |      |      | Hospitals |      |      |      | Primary care institutions* |      |      |      |
|--------------------------|-----------------------------|------|------|------|-----------|------|------|------|----------------------------|------|------|------|
|                          | 2005                        | 2010 | 2015 | 2018 | 2005      | 2010 | 2015 | 2018 | 2005                       | 2010 | 2015 | 2018 |
| <b>Gender</b>            |                             |      |      |      |           |      |      |      |                            |      |      |      |
| Male                     | 1.7                         | 1.7  | 2.0  | 2.3  | 1.6       | 1.8  | 2.2  | 2.7  | 2.3                        | 1.5  | 1.3  | 1.3  |
| Female                   | 98.3                        | 98.3 | 98.0 | 97.7 | 98.4      | 98.2 | 97.8 | 97.3 | 97.7                       | 98.5 | 98.7 | 98.7 |
| <b>Age</b>               |                             |      |      |      |           |      |      |      |                            |      |      |      |
| under 25                 | 10.1                        | 14.1 | 14.1 | 9.7  | 10.2      | 14.7 | 15.0 | 9.7  | 9.1                        | 12.3 | 12.0 | 9.0  |
| 25~34                    | 40.3                        | 39.6 | 46.8 | 50.6 | 38.2      | 39.0 | 48.8 | 53.1 | 52.6                       | 42.5 | 39.9 | 42.7 |
| 35~44                    | 31.6                        | 26.9 | 22.0 | 22.1 | 32.7      | 26.6 | 19.9 | 20.6 | 25.6                       | 30.1 | 31.6 | 28.7 |
| 45~54                    | 17.3                        | 16.9 | 14.0 | 12.7 | 18.1      | 17.6 | 13.7 | 12.1 | 12.1                       | 13.4 | 14.7 | 16.3 |
| 55~59                    | 0.6                         | 2.2  | 2.0  | 3.4  | 0.6       | 2.0  | 1.9  | 3.4  | 0.5                        | 1.5  | 1.4  | 2.7  |
| 60 or above              | 0.1                         | 0.4  | 1.1  | 1.5  | 0.1       | 0.2  | 0.7  | 1.1  | 0.1                        | 0.2  | 0.4  | 0.6  |
| <b>Work</b>              |                             |      |      |      |           |      |      |      |                            |      |      |      |
| <b>Experience(years)</b> |                             |      |      |      |           |      |      |      |                            |      |      |      |
| under 5                  | 14.1                        | 23.6 | 29.7 | 21.3 | 14.0      | 24.3 | 31.4 | 21.7 | 14.3                       | 21.1 | 25.8 | 19.5 |
| 5~9                      | 19.4                        | 16.2 | 24.1 | 31.2 | 17.5      | 16.5 | 24.8 | 32.5 | 30.2                       | 13.8 | 21.0 | 27.2 |
| 10~19                    | 35.9                        | 29.1 | 20.6 | 23.9 | 36.3      | 27.2 | 19.1 | 23.7 | 35.0                       | 39.0 | 25.8 | 23.6 |
| 20~29                    | 22.7                        | 21.8 | 16.7 | 14.3 | 23.8      | 22.8 | 16.1 | 13.1 | 16.6                       | 18.9 | 20.5 | 21.4 |
| 30 or above              | 7.7                         | 9.3  | 8.8  | 9.3  | 8.3       | 9.3  | 8.5  | 9.1  | 3.9                        | 7.2  | 6.9  | 8.3  |
| <b>Education</b>         |                             |      |      |      |           |      |      |      |                            |      |      |      |
| Master's or above        | 0.0                         | 0.1  | 0.1  | 0.2  | 0.0       | 0.1  | 0.2  | 0.2  | 0.0                        | 0.0  | 0.0  | 0.0  |
| Bachelor's               | 2.7                         | 8.7  | 14.5 | 20.8 | 3.2       | 10.5 | 16.7 | 23.5 | 0.4                        | 2.6  | 6.9  | 13.4 |
| Associate's              | 28.9                        | 42.5 | 47.9 | 48.9 | 31.8      | 45.5 | 50.3 | 50.4 | 14.1                       | 32.8 | 39.9 | 44.4 |
| Vocational education     | 60.4                        | 46.0 | 36.3 | 29.6 | 57.7      | 41.5 | 31.9 | 25.5 | 73.9                       | 60.4 | 51.2 | 41.1 |
| High school or below     | 7.9                         | 2.7  | 1.1  | 0.6  | 7.3       | 2.5  | 1.0  |      | 11.6                       | 4.2  | 2.0  | 1.1  |
|                          |                             |      |      |      |           |      |      | 0.5  |                            |      |      |      |

Note: \*Estimated by authors based on demographics data of community health service stations and township health centers.

Young nurses are the main force of the nurse workforce in China. Employees under 35-year-old were accounted for 60.3% of the total nurses in 2018. In table 2, the proportion of nurses between the age of 25 and 34 and those over 55-year-old increased during 2005-2018, whereas the proportion of nurses between 35 and 54 declined slightly. Moreover, the proportion of nurses between 25-34 years old grew gradually in hospital settings but decreased in the primary care institutions across the 15 years. In 2018, there were more young nurses (under 35) in hospitals than primary care institutions.

The nurses' educational levels have changed over time with an increased proportion of the higher level of degrees. The percentage of nurses with a vocational education degree or below dropped year by year, from 74.4% in 2002 to 30.2% in 2018. Associate's degree nurses have become the main force of registered nurses in China, accounting for 48.9% in 2018. The growth of nurses with bachelor's, master's, or Ph.D. degree was fast over the period. By the end of 2018, the proportion of nurses with a

1  
2  
3 bachelor's degree or above have reached 21.0%. Compared with primary care settings, hospitals had  
4 more nurses with higher education levels.  
5

6 The proportion of experienced nurses who were serving more than 30 years was relatively small  
7 in China nurse workforce. The proportion of nurses with 10-29 years' work experience has decreased  
8 continually (58.6% in 2005 to 38.2% in 2018), while the percentage of nurses with less than 10 years'  
9 experience increased (33.5% in 2005 to 52.5% in 2018). A similar trend was shown overtime for the  
10 distribution of nurse working experience in the hospital and primary care settings, but more hospital  
11 nurses had less than 10 years' work experience, and more primary care nurses were with more than 20  
12 years' work experience.  
13  
14  
15

### 16 **Distribution across Provinces, Rural-Urban Areas, and Settings**

17 We adopted the latest data of 2018 to analyze the nurse distribution among different provinces in  
18 China. The density of nurses in each of the provinces and areas ranged from approximately a high of  
19 5.0 nurses in Beijing to a low of 1.6 nurses per 1000 population in Tibet. Figure 4 shows that the  
20 provinces in the Northeastern and Western regions had a relatively low density of the nurse workforce,  
21 whereas provinces in the Central and Eastern regions tended to have a high nurse per capital supply.  
22  
23

24 As for the urban-rural distribution of nurses in China, the criteria used in the datasets for dividing  
25 urban and rural areas before 2010 were different from those for the recent years, therefore we used the  
26 data from 2010 to 2018 for analysis. The data shows that there were huge differences between urban  
27 and rural areas. In 2010, there were more than three nurses per 1000 population in urban areas, while  
28 there was less than one nurse per 1000 population among rural areas. Over the past decade, the number  
29 and density of nurses in both urban and rural areas have greatly increased, but the gap between urban  
30 and rural areas has not been narrowed. By 2018, there were 5.08 nurses per 1000 population in urban  
31 areas, while the number of that in rural areas was still less than two (Supplementary file).  
32  
33

34 In 2018, the majority of nurses (73.70%) were employed within hospital settings, and only about  
35 20% of nurses worked in primary care institutions (see Figure 5). Over the past ten years, there was a  
36 tendency that more patients went to hospitals rather than primary care institutions (Supplementary file).  
37 Hospitals received more than 70% of inpatients and 40% of overall outpatient visits, and primary  
38 health care institutions were responsible for over 50% of the visits and 20% of inpatients. During the  
39 last decade, although the number of nurses working in all institutions has increased significantly, the  
40 distribution of nurses across settings had no significant changes.  
41  
42  
43

44 To further examine the distribution of equality of the nurse workforce, we calculated the Gini  
45 coefficient and Theil L index. Although the analyses were based on the provincial data, due to the lack  
46 of valid individual residential data, the results demonstrated significance for understanding the  
47 distribution across provinces and between the urban and rural areas over the country. The Gini  
48 coefficient of nurses fell from 0.167 in 2010 to 0.119 in 2018. Between-provincial Theil index had  
49 similar trends to the corresponding Gini index, dropped from 0.010 in 2010 to 0.004 in 2018. Overall  
50 and within-provincial Theil index experienced a decline from 2010 to 2015 and has risen again in the  
51 past three years. Within-province inequality accounted for overall inter-provincial inequality has risen  
52 consistently, with a peak in 2018 (Theil L: from 52.38% in 2010 to 71.43% in 2018) (Supplementary  
53 file).  
54  
55  
56  
57  
58  
59  
60

## DISCUSSION

Understanding the nurse trends, composition, and distribution of supply is crucial for building an effective health care system. This article presents national data with longitudinal and recent status on the nurse workforce in China from 2003 to 2018. To the best of our knowledge, this is the first article to report trends of the nurse workforce on such a large scale and over the past 15 years of period. As in many ways, the nursing human resources and education, and health and family policy all impact each other,<sup>[21]</sup> the results of the analysis in this article could be used for policymaking, healthcare administration, education, and further research to strengthen nurse workforce.

The number of Chinese nurse workforce in 2017 (3.8 million) accounted for 18 percent of the nurse workforce in the world (20.7 million), and the number of nurses increased to 4.1 million in 2018.<sup>[22]</sup> The Chinese nurses per 1000 population were 2.94 in 2018, exceeding the minimum standard set by WHO (two nurses per 1000 populations) and some developing countries (e.g. India and South Africa), yet this density is still relatively below the average density of Organization for Economic Co-operation and Development (OECD) member countries (nine nurses per 1000 populations and 50% of WHO Member States in 2017.<sup>[22, 23]</sup> The ratio of nurses to physicians is another widely used indicator to show nurse supply. The trends in the number of physicians and nurses in Figure 1 indicate intuitive changes in the ratio of nurses to physicians in the past 15 years. The size of physicians over nurses had been consistently large in China until the changes occurred in 2014, for the first time, the problem of an inverted ratio of doctors to nurses was reversed. The larger size of physicians over nurses during a long period of history in China is associated with many factors and one of the reasons may be related to the duties and responsibilities of nurses and physicians different from other countries.<sup>[24]</sup> Physicians in China have been responsible for some patient care, which may be taken charge of by nurses in other countries.

Besides, we found that changes in growth rates of the nurse workforce were highly associated with policy shifts. In 2003, The Chinese Ministry of Education and the Ministry of Health issued the policies highlighting the nursing shortage, encouraging higher nursing education, and addressing the development of community health services,<sup>[15]</sup> as such, our data shows a milestone for the growth of nurse workforce at that period. In 2008, the healthcare system reform began in China, aimed to strengthen the nurse workforce, which was another significant impact on nursing growth.<sup>[25]</sup> In 2011, the Ministry of Education of the People's Republic of China issued a document to set nursing as a first-level discipline independent of clinical medicine admissions.<sup>[26]</sup> The number of nursing colleges and nursing programs has increased steadily, ensuring a rapid increase in the number of nurses.<sup>[27]</sup> Although the initial implementation of health care reform policy and the global financial crisis may affect the growth rate slightly in 2008, nurses' numbers were in a period of rapid growth, which brings about the number of nurses surpassed the number of physicians for the first time in 2014. In recent years, the support of national policies, and the increase in specialist nurses' training programs and bases increased the social recognition and attractiveness of nursing positions. Accordingly, a certain number of outstanding talents for Chinese nursing were attracted. However, the ratio of nurses to physicians is still not adequately balanced compared with many developed and developing countries worldwide.<sup>[1]</sup> Given that, along with an increasingly severe aging population and frequent epidemic challenges, it is vital to adopt effective policies attracting more talents to enter nursing practice.

1  
2  
3 The demographic composition of the nurse workforce consists of gender, age, education, and  
4 working experience. Gender diversity is still lacking in the nursing profession in China. Gender  
5 distribution shows that along with the increased proportion of male nurses, the nurse workforce in  
6 China is slowly becoming more diverse over time. There is a high demand for male nurses in China,  
7 especially after China implemented the universal two-child policy in 2016. Moreover, male nurses  
8 show great advantages in physical strength, mental toughness, and mechanics sensitivity. Accordingly,  
9 Chinese male nurses have better career prospects and promotion chances compared with female  
10 nurses.<sup>[28]</sup> The occupational cognition of male nurses is also improving in China in recent years.<sup>[29]</sup>  
11 However, the proportion of male nurses is relatively low compared to the US and the UK.<sup>[30, 31]</sup>  
12 Notably, China nurse workforce has been dominated by young aged nurses. In 2018, the proportion of  
13 nurses aged 55 or above was 4.9 percent in China that is largely lower than that in the UK (19%) and  
14 US (46%).<sup>[30, 31]</sup> And the proportion of nurses with more than 30 years of experience consistently below  
15 10%. This could be mainly explained by the continuous nurse shortage 30 years ago. In 1990, China  
16 had 1.14 billion people but fewer than one million nurses. The severe shortage of nurses in the past has  
17 led to a shortage of aged and clinically experienced nurses today. In another respect, the young nurse  
18 workforce is an invaluable asset of the health care system in China in addressing the shortage of  
19 nursing and dealing with social health issues. In the period of fighting the COVID-19 epidemic in  
20 Wuhan, nurses aged 40 or under accounted for more than 90%, playing a vital role in fighting the virus.  
21 When the policymakers are seeking solutions to overcome the nurse shortage, it is crucial to consider  
22 and develop strategies to retain the young nurses in the workforce and extend their working years.

23  
24  
25 As for the educational level of nurses, our results confirmed that it was not until 2010 the  
26 educational composition of nurses shifted from the main body of vocational education and below  
27 associate's degree and above. Although there is a gradual increase in the proportion of nurses with an  
28 Associate degree and Bachelor's degree or above, there is still a gap between China and developed  
29 countries.<sup>[30, 31]</sup> There was only 2.7% of nurses who have got a bachelor's degree in 2005. The main  
30 reason for the low percentage was that undergraduate nursing education wasn't re-start until 1983 with  
31 over twenty years of break in China.<sup>[32]</sup> However, as of 2006, a total of 192 colleges and universities  
32 across the country enrolled nursing undergraduates, with more than 20,000 students enrolled.<sup>[32]</sup> By  
33 2018, there were over 260 colleges and universities that cultivated nursing undergraduates, while 21%  
34 of nurses got a bachelor's degree and above. The evidence that nurses with higher education contribute  
35 greatly to producing high-quality care is strong. Studies report a significant association between  
36 educational level and patient outcomes, including mortality rates.<sup>[4, 33, 34]</sup> It is urgent to advance the  
37 education level of nurses in China through changes in policy, administration, and curricula, including  
38 financial advising, academic advising, and easier access to programs (e.g. flexible hours, and/or online  
39 courses).<sup>[35, 36]</sup> Also, a higher education expectation, supportive approaches from the employer could  
40 encourage nurses to continue their education.<sup>[35, 37]</sup>

41  
42  
43 The nurse workforce is not distributed equally across China. The results demonstrated a  
44 substantial variation of nursing resources across geographic and/or economic areas: a high  
45 concentration of nurses/providers within urban and/or affluent areas, versus a relative undersupply in  
46 rural and/or low-income areas. Such imbalance in the nurse workforce is neither unique to China nor to  
47 global nurse providers, which is a worldwide problem for all healthcare professionals.<sup>[38, 39]</sup> By  
48 calculating the Gini coefficient and Theil L index, we found that the differences in the distribution of  
49  
50  
51  
52  
53  
54  
55  
56  
57  
58  
59  
60



nurses in China are mainly reflected in urban and rural areas, while distribution inequality across provinces was decreasing in recent years. Considering that there are more elderly and children in need of health care reside in rural areas of China, it suggests that in the future, more attention should be paid to the urban-rural gap when focusing on health equity between provinces. In terms of distribution in different settings, the majority of nurses are still employed within the hospitals, despite policies that have aimed to strengthen primary care and shift health services towards the community.<sup>[15, 40]</sup> The proportion of nurses employed in hospitals in China is higher compared with high-income countries (e.g., England, Japan, and the US). To address the imbalanced distribution of healthcare professionals, evidence-based interventions/strategies are suggested, including focused recruitment and training, improved living and working environment, and financial and professional incentives.<sup>[41, 42]</sup>

### Limitations

This study is the first to report trends, composition, and distribution of the Chinese nurse workforce over 2003-2018. However, there are some limitations to the study. Firstly, there is no nurse composition data available before 2005 from CHFPSY/CSY, and we haven't found any related data or survey. Despite some data gaps, we used the largest available data which was meant to reflect the latest trends. Secondly, as the data collection methods have been constantly modified and updated in the national surveys, it would have a certain impact on our analysis. A new criterion of urban and rural classification was adopted in 2010, which brought the incomparability of urban-rural distribution over time. In this case, we conduct analysis using data that adopt the latest standards to enhance the comparability of the results across times.

### CONCLUSION

Significant changes in China's nurse workforce were found over time, such as a great increase in the number of nurses, improvement in education, and decreasing nurse workforce inequality. These changes might be highly associated with policy reformations and social and economic needs at national and global levels. Our study also suggests current features in the nurse workforce. Nurses in China are featured with less gender diversity, tend to be younger, and have lower education compared to developed countries. Findings in our study provide evidence to inform nurse workforce policy in the future.

**Contributors:** HL and LYH are joint first authors. SMS, XMC, XYJ, and DD designed the study. HL, SDJ, and MQW collected the data. LYH, HL, and WJZ analyzed the data. HL and LYH drafted the manuscript. QLS and WJZ revised the manuscript. All authors have read and approved the final manuscript. SMS, XMC, and DD are the study guarantors.

**Funding:** This research received no specific grant from any funding agency in the public, commercial or not-for-profit sectors.

**Competing interests:** We have read and understood BMJ policy on declaration of interests and declare that we have no competing interests.

**Data sharing:** The access policy and procedures are available at <https://data.cnki.net/yearbook>.

## REFERENCE

1. Drennan VM, Ross F. Global nurse shortages-the facts, the impact and action for change. *BRITISH MEDICAL BULLETIN* 2019;130(1):25-37. doi: 10.1093/bmb/ldz014
2. Filip H, Peter VB, Koen DM, et al. The impact of nurse staffing levels and nurse's education on patient mortality in medical and surgical wards: an observational multicentre study. *BMC health services research* 2019;19(1):1-864. doi: 10.1186/s12913-019-4688-7
3. Arshia A, Katri V-J, Tytti S-V, et al. Impact of nurse staffing on reducing infant, neonatal and perinatal mortality rates: Evidence from panel data analysis in 35 OECD countries. *International journal of nursing sciences* 2020;7(2):161-69. doi: 10.1016/j.ijnss.2020.02.002
4. Aiken LH, Sloane DM, Bruyneel LMS, et al. Nurse staffing and education and hospital mortality in nine European countries: a retrospective observational study. *The Lancet* 2014;383(9931):1824-30. doi: 10.1016/S0140-6736(13)62631-8
5. Arshia A, Tytti S-V. Nurse-staffing level and quality of acute care services: Evidence from cross-national panel data analysis in OECD countries. *International journal of nursing sciences* 2019;6(1):6-16. doi: 10.1016/j.ijnss.2018.11.010
6. James SL, Abate D, Abate KH, et al. Global, regional, and national incidence, prevalence, and years lived with disability for 354 diseases and injuries for 195 countries and territories, 1990–2017: a systematic analysis for the Global Burden of Disease Study 2017. *The Lancet* 2018;392(10159):1789-858. doi: 10.1016/S0140-6736(18)32279-7
7. Appleby J. Nursing workforce crisis in numbers. *BMJ* 2019;367:l6664-164. doi: 10.1136/bmj.l6664
8. Scheffler RM, Arnold DR. Projecting shortages and surpluses of doctors and nurses in the OECD: what looms ahead. *Health economics, policy and law* 2019;14(2):274-90. doi: 10.1017/S174413311700055X
9. World Health Organization a. Health workforce education and training [Available from: <https://www.who.int/activities/health-workforce-education-and-training> accessed 03-10 2020.
10. World Health Organization. Global strategy on human resources for health: Workforce 2030 2016 [Available from: [https://www.who.int/hrh/resources/glob-strat-hrh\\_workforce2030.pdf](https://www.who.int/hrh/resources/glob-strat-hrh_workforce2030.pdf) accessed 03-24 2020.
11. 2020 NSI National Health Care Retention & RN Staffing Report, 2020:1.
12. The Central People's Government of the People's Republic of China. China's total population is close to 1.4 billion at the end of 2018 2019 [Available from: [http://www.gov.cn/xinwen/2019-01/21/content\\_5359797.htm](http://www.gov.cn/xinwen/2019-01/21/content_5359797.htm) accessed 03-23 2020.
13. Zhou K, Zhang X, Ding Y, et al. Inequality trends of health workforce in different stages of medical system reform (1985-2011) in China. *Human Resources for Health* 2015;13(1):94. doi: 10.1186/s12960-015-0089-0
14. Yang J-S, Hao D-J. Dilemmas for nurses in China. *The Lancet* 2018;392(10141):30-30. doi: 10.1016/S0140-6736(18)31185-1
15. Ministry of Education of the People's Republic of China. The Ministry of Education and the Ministry of Health identify vocational colleges to develop nursing specialty areas and



- define nurses as talent in shortage. In: China MoEotPsRo, ed. China, 2003.
16. National Health and Family Planning Commission. National nursing Development Plan (2016-2020). In: Commission NHaFP, ed., 2016.
  17. National Bureau of Statistics of China. Statistical Communique of the People's Republic of China on the 2019 National Economic and Social Development 2019 [Available from: <https://data.cnki.net/yearbook/Single/N2020040350>].
  18. World Health Organization. Measuring health workforce inequalities: methods and application to China and India. In: World Health Organization, ed., 2010.
  19. Theodorakis PN, Mantzavinis GD, Rrumbullaku L, et al. Measuring health inequalities in Albania: A focus on the distribution of general practitioners. *Human Resources for Health* 2006;4(1):5-5. doi: 10.1186/1478-4491-4-5
  20. Akita T. Decomposing regional income inequality in China and Indonesia using two-stage nested Theil decomposition method. *The Annals of Regional Science* 2003;37(1):55-77. doi: 10.1007/s001680200107
  21. Gunn V, Muntaner C, Ng E, et al. The influence of welfare state factors on nursing professionalization and nursing human resources: A time-series cross-sectional analysis, 2000–2015. *Journal of Advanced Nursing* 2019;75(11):2797-810. doi: 10.1111/jan.14155
  22. World Health Organization b. Health workforce [Available from: [https://www.who.int/hrh/nursing\\_midwifery/en/](https://www.who.int/hrh/nursing_midwifery/en/). accessed 2020-03-22.
  23. OECD. Health at a Glance 2017: OECD Indicators. Paris, 2017.
  24. Yun H, Jie S, Anli J. Nursing shortage in China: State, causes, and strategy. *Nursing Outlook* 2010;58(3):122-28. doi: 10.1016/j.outlook.2009.12.002
  25. The Central People's Government of the People's Republic of China. Suggestions request for medical and health system reform 2008 [Available from: [http://www.gov.cn/gzdt/2008-10/14/content\\_1120143.htm](http://www.gov.cn/gzdt/2008-10/14/content_1120143.htm)].
  26. Ministry of Education of the People's Republic of China. Notice on Issuing the Catalogue of Disciplines for Degree Awarding and Talent Training (2011) 2011 [Available from: [http://www.moe.gov.cn/srcsite/A22/moe\\_833/201103/t20110308\\_116439.html](http://www.moe.gov.cn/srcsite/A22/moe_833/201103/t20110308_116439.html) accessed 03-08 2011.
  27. China Academic Degree & Graduate Education Information. Universities list of master of nursing specialist admissions 2011 [Available from: <https://www.cdgc.edu.cn/xwyyjsjyxx/gjjl/szfa/hlss/index.shtml>].
  28. Zhang H, Tu J. The working experiences of male nurses in China: Implications for male nurse recruitment and retention. *J Nurs Manag* 2020;28(2):441-49. doi: 10.1111/jonm.12950 [published Online First: 2020/01/08]
  29. Yao X, Cheng G, Yang L. Investigation of professional status and occupational cognition among male nurses in China *Chinese Nursing Management* 2020;20(8):1232-35.
  30. Royal College of Nursing. The UK nursing labour market review 2018, 2019.
  31. Smiley RA, Lauer P, Bienemy C, et al. The 2017 National Nursing Workforce Survey. *Journal of Nursing Regulation* 2018;9(3):S1-S88. doi: 10.1016/S2155-8256(18)30131-5
  32. Zheng X. Undergraduate nursing education in Mainland China: overview, opportunities and challenges. *Chinese Journal of Nursing Education* 2009;6(3):139-41. doi:

10.3761/j.issn.1672-9234.2009.03.017

33. Aiken LH, Cimiotti JP, Sloane DM, et al. Effects of nurse staffing and nurse education on patient deaths in hospitals with different nurse work environments. *The Journal of nursing administration* 2012;42(10 ):S10. doi: 10.1097/MLR.0b013e3182330b6e
34. Cho E, Sloane DM, Kim E-Y, et al. Effects of nurse staffing, work environments, and education on patient mortality: An observational study. *International Journal of Nursing Studies* 2015;52(2):535-42. doi: 10.1016/j.ijnurstu.2014.08.006
35. Altmann TK. Registered nurses returning to school for a bachelors degree in nursing: Issues emerging from a meta-analysis of the research. *Contemporary Nurse* 2011;39(2):256-72. doi: 10.5172/conu.2011.39.2.256
36. Rich KL, Nugent KE. A United States perspective on the challenges in nursing education. *Nurse Education Today* 2010;30(3):228-32. doi: 10.1016/j.nedt.2009.10.015
37. Kovner CT, Djukic M, Jun J, et al. Diversity and education of the nursing workforce 2006–2016. *Nursing Outlook* 2018;66(2):160-67. doi: 10.1016/j.outlook.2017.09.002
38. Karan A, Negandhi H, Nair R, et al. Size, composition and distribution of human resource for health in India: new estimates using National Sample Survey and Registry data. *BMJ open* 2019;9(4):e025979. doi: 10.1136/bmjopen-2018-025979
39. Ono T, Schoenstein M, Buchan J. Geographic Imbalances in Doctor Supply and Policy Responses. *OECD Health Working Papers* 2014(69):0\_1.
40. The Central People's Government of the People's Republic of China. Deepening the medical and health systemt reform 2009 [Available from: [http://www.gov.cn/jrzq/2009-04/06/content\\_1278721.htm](http://www.gov.cn/jrzq/2009-04/06/content_1278721.htm).
41. MacLeod MLP, Stewart NJ, Kulig JC, et al. Nurses who work in rural and remote communities in Canada: A national survey. *Human Resources for Health* 2017;15(1):34-11. doi: 10.1186/s12960-017-0209-0
42. Wilson NW, Couper ID, De Vries E, et al. A critical review of interventions to redress the inequitable distribution of healthcare professionals to rural and remote areas. *Rural and remote health* 2009;9(2):1060.

## Figures

Figure 1. Trends in the supply of nurses and physicians from 2003 to 2018

Figure 2. The growth rates in the supply of nurses and physicians from 2003 to 2018

Figure 3. Change of the proportion of male nurses from 2005 to 2018

Figure 4. Distribution of nurses across provinces in China, 2018

Figure 5. Change of nurse distribution across settings in China from 2010 to 2018

1  
2  
3  
4  
5  
6  
7  
8  
9  
10  
11  
12  
13  
14  
15  
16  
17  
18  
19  
20  
21  
22  
23  
24  
25  
26  
27  
28  
29  
30  
31  
32  
33  
34  
35  
36  
37  
38  
39  
40  
41  
42  
43  
44  
45  
46  
47  
48  
49  
50  
51  
52  
53  
54  
55  
56  
57  
58  
59  
60

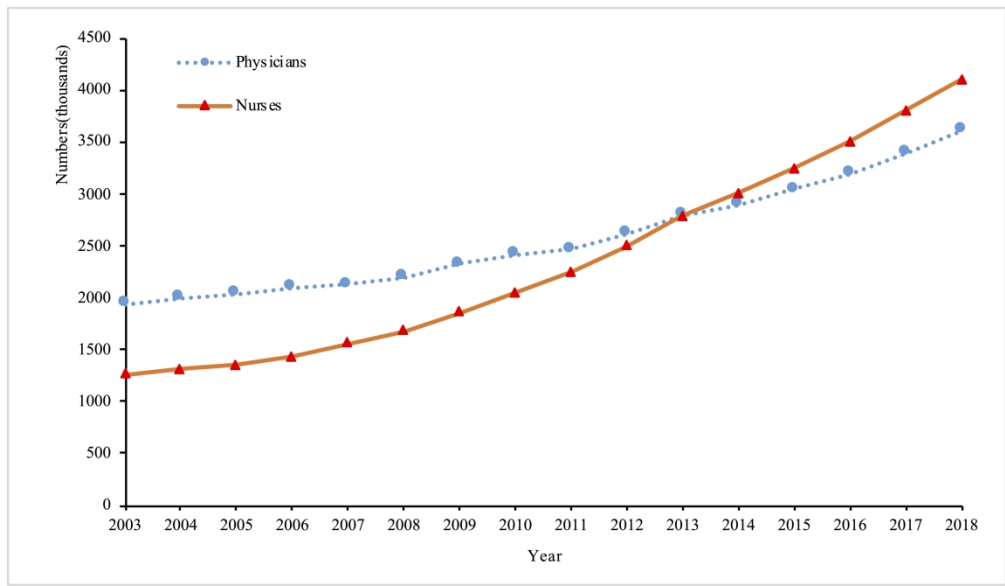

Figure 1. Trends in the supply of nurses and physicians from 2003 to 2018

170x98mm (600 x 600 DPI)

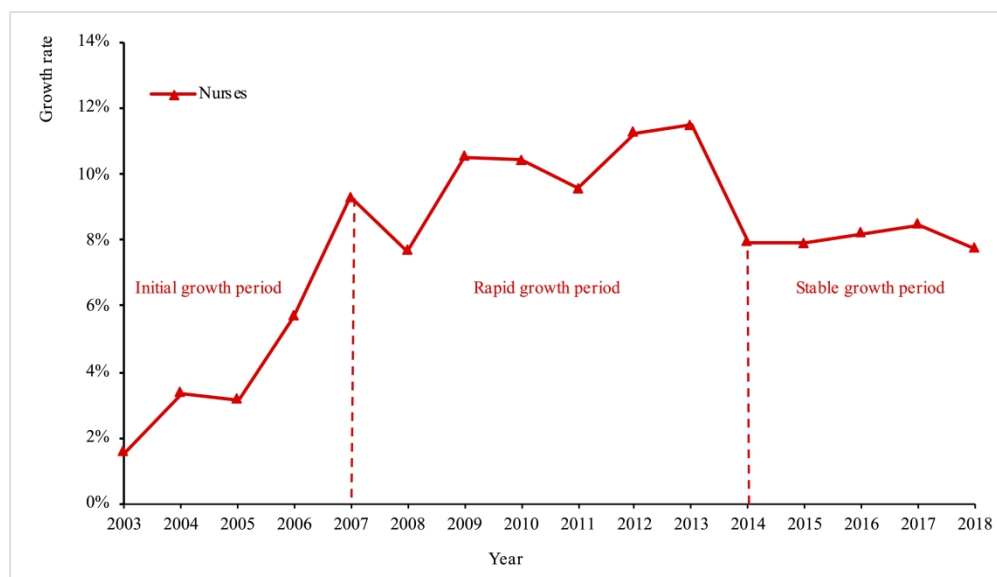

Figure 2. The growth rates in the supply of nurses and physicians from 2003 to 2018

161x92mm (600 x 600 DPI)

1  
2  
3  
4  
5  
6  
7  
8  
9  
10  
11  
12  
13  
14  
15  
16  
17  
18  
19  
20  
21  
22  
23  
24  
25  
26  
27  
28  
29  
30  
31  
32  
33  
34  
35  
36  
37  
38  
39  
40  
41  
42  
43  
44  
45  
46  
47  
48  
49  
50  
51  
52  
53  
54  
55  
56  
57  
58  
59  
60

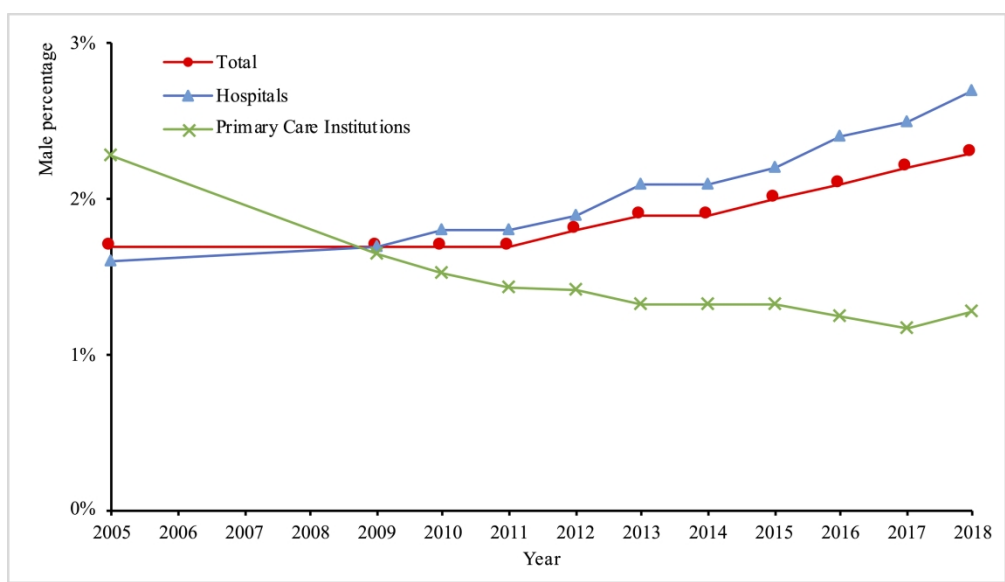

Figure 3. Change of the proportion of male nurses from 2005 to 2018

147x83mm (600 x 600 DPI)

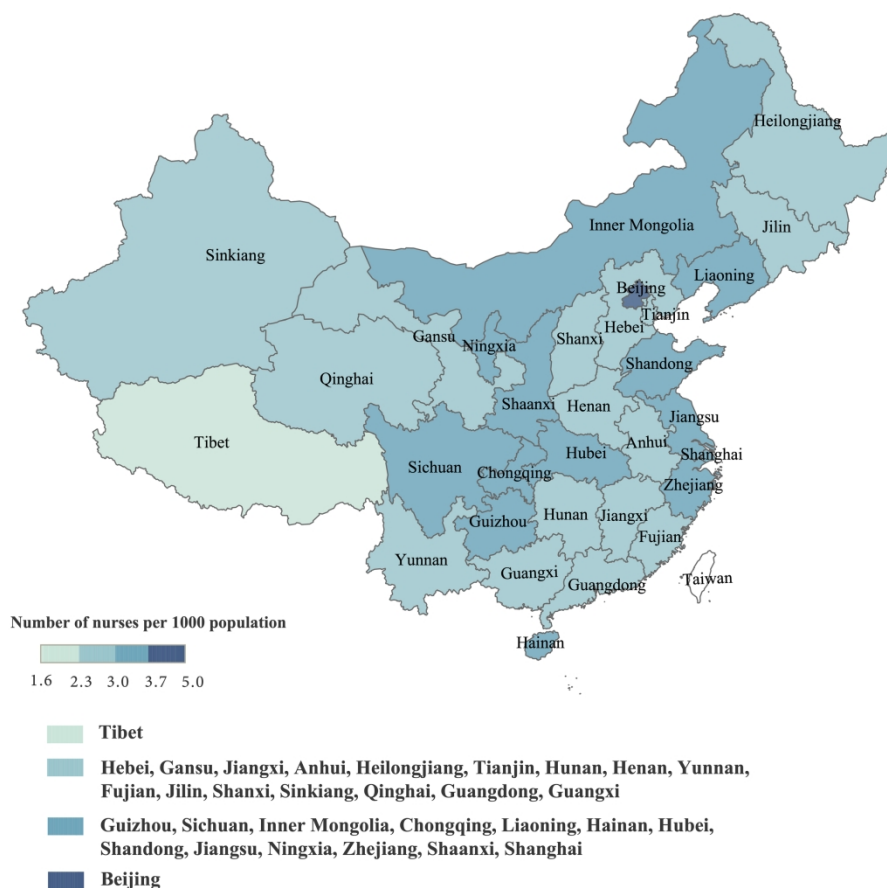

Figure 4. Distribution of nurses across provinces in China, 2018

126x130mm (600 x 600 DPI)

1  
2  
3  
4  
5  
6  
7  
8  
9  
10  
11  
12  
13  
14  
15  
16  
17  
18  
19  
20  
21  
22  
23  
24  
25  
26  
27  
28  
29  
30  
31  
32  
33  
34  
35  
36  
37  
38  
39  
40  
41  
42  
43  
44  
45  
46  
47  
48  
49  
50  
51  
52  
53  
54  
55  
56  
57  
58  
59  
60

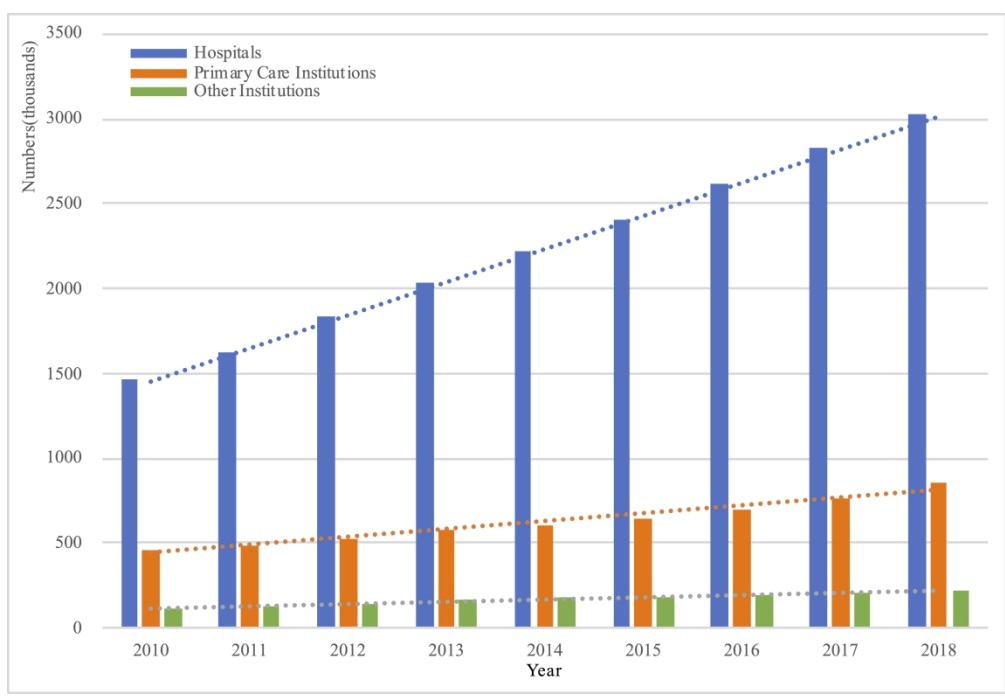

Figure 5. Change of nurse distribution across settings in China from 2010 to 2018

156x106mm (600 x 600 DPI)

---

**Supplemental files:****Table A. Urban-rural distribution of nurse workforce from 2010 to 2018**

| Year | Urban   |          | Rural   |          |
|------|---------|----------|---------|----------|
|      | Number  | Density* | Number  | Density* |
| 2010 | 1200343 | 3.09     | 847728  | 0.89     |
| 2011 | 1304202 | 3.29     | 939818  | 0.98     |
| 2012 | 1449513 | 3.65     | 1047086 | 1.09     |
| 2013 | 1603913 | 4.00     | 1179208 | 1.22     |
| 2014 | 1737367 | 4.30     | 1266777 | 1.31     |
| 2015 | 1892835 | 4.58     | 1348634 | 1.39     |
| 2016 | 2063019 | 4.75     | 1444147 | 1.50     |
| 2017 | 2244366 | 5.01     | 1559655 | 1.62     |
| 2018 | 2417653 | 5.08     | 1680977 | 1.80     |

Note: \*Per 1000 population.



**Table B. The amount of visits, inpatients and nurses distribution across settings in China from 2010 to 2018**

| Year | Hospitals                                 |         |                              |         |          |         | Primary Care Institutions*                |         |                              |         |          |         | Other Institutions*                       |         |                              |         |          |         |
|------|-------------------------------------------|---------|------------------------------|---------|----------|---------|-------------------------------------------|---------|------------------------------|---------|----------|---------|-------------------------------------------|---------|------------------------------|---------|----------|---------|
|      | Outpatient Visits<br>(10000 person-times) |         | Inpatients<br>(10000 person) |         | Nurses   |         | Outpatient Visits<br>(10000 person-times) |         | Inpatients<br>(10000 person) |         | Nurses   |         | Outpatient Visits<br>(10000 person-times) |         | Inpatients<br>(10000 person) |         | Nurses   |         |
|      | <i>n</i>                                  | percent | <i>n</i>                     | percent | <i>n</i> | percent | <i>n</i>                                  | percent | <i>n</i>                     | percent | <i>n</i> | percent | <i>n</i>                                  | percent | <i>n</i>                     | percent | <i>n</i> | percent |
| 2010 | 203963.3                                  | 34.9%   | 9524                         | 67.2%   | 1468754  | 71.7%   | 361155.6                                  | 61.9%   | 3950                         | 27.9%   | 466503   | 22.8%   | 18642.7                                   | 3.2%    | 700                          | 4.9%    | 112814   | 5.5%    |
| 2011 | 225883.7                                  | 36.0%   | 10755                        | 70.3%   | 1627761  | 72.5%   | 380559.8                                  | 60.7%   | 3775                         | 24.7%   | 492554   | 21.9%   | 20679.1                                   | 3.3%    | 768                          | 5.0%    | 123705   | 5.5%    |
| 2012 | 254161.6                                  | 36.9%   | 12727                        | 71.3%   | 1830202  | 73.3%   | 410920.6                                  | 59.7%   | 4254                         | 23.8%   | 528178   | 21.2%   | 23750.7                                   | 3.4%    | 876                          | 4.9%    | 138219   | 5.5%    |
| 2013 | 274177.7                                  | 37.5%   | 14007                        | 72.9%   | 2041367  | 73.3%   | 432431                                    | 59.1%   | 4300                         | 22.4%   | 576630   | 20.7%   | 24792.3                                   | 3.4%    | 908                          | 4.7%    | 165124   | 5.9%    |
| 2014 | 297207                                    | 39.1%   | 15375                        | 75.2%   | 2222293  | 74.0%   | 436394.9                                  | 57.4%   | 4094                         | 20.0%   | 603900   | 20.1%   | 26584.7                                   | 3.5%    | 972                          | 4.8%    | 177951   | 5.9%    |
| 2015 | 308364.1                                  | 40.1%   | 16087                        | 76.4%   | 2407632  | 74.3%   | 434192.7                                  | 56.4%   | 4036                         | 19.2%   | 646607   | 19.9%   | 26785.7                                   | 3.5%    | 930                          | 4.4%    | 187230   | 5.8%    |
| 2016 | 326955.9                                  | 41.2%   | 17528                        | 77.1%   | 2613367  | 74.5%   | 436663.3                                  | 55.1%   | 4165                         | 18.3%   | 695781   | 19.8%   | 29550.8                                   | 3.7%    | 1035                         | 4.6%    | 198018   | 5.6%    |
| 2017 | 343892.1                                  | 42.0%   | 18915                        | 77.4%   | 2822446  | 74.2%   | 442891.6                                  | 54.1%   | 4450                         | 18.2%   | 769206   | 20.2%   | 31527.3                                   | 3.9%    | 1071                         | 4.4%    | 212369   | 5.6%    |
| 2018 | 357737.5                                  | 43.1%   | 20017                        | 78.6%   | 3020813  | 73.7%   | 440632                                    | 53.0%   | 4376                         | 17.2%   | 852377   | 20.8%   | 32432.2                                   | 3.9%    | 1060                         | 4.2%    | 225440   | 5.5%    |

Note: No data available for primary care institutions before 2010, so we used the data from 2010 to 2018 for analysis. \*Include specialized public health institutions, sanatoriums, clinical laboratory centers, medicinal scientific research institutions, on-job training institutions, health supervision institutions, medical examination centers, rural water improvement centers, talent exchange centers, and statistical information centers, etc.

**Table C. Gini coefficient and Theil index of nurse workforce from 2010 to 2018**

|      | Overall inter-provincial |         | Between-provincial | Within-provincial | Within provincial<br>/overall |
|------|--------------------------|---------|--------------------|-------------------|-------------------------------|
|      | Gini                     | Theil L | Theil L            | Theil L           | Theil L                       |
| 2010 | 0.167                    | 0.021   | 0.010              | 0.011             | 52.38%                        |
| 2011 | 0.150                    | 0.016   | 0.008              | 0.008             | 50.00%                        |
| 2012 | 0.139                    | 0.015   | 0.008              | 0.007             | 46.67%                        |
| 2013 | 0.133                    | 0.013   | 0.007              | 0.006             | 46.15%                        |
| 2014 | 0.125                    | 0.012   | 0.006              | 0.006             | 50.00%                        |
| 2015 | 0.123                    | 0.012   | 0.006              | 0.006             | 50.00%                        |
| 2016 | 0.121                    | 0.015   | 0.005              | 0.010             | 66.67%                        |
| 2017 | 0.120                    | 0.015   | 0.005              | 0.010             | 66.67%                        |
| 2018 | 0.119                    | 0.014   | 0.004              | 0.010             | 71.43%                        |

# BMJ Open

## Trends, Composition, and Distribution of Nurse Workforce in China: A Secondary Analysis of National Data from 2003 to 2018

|                                 |                                                                                                                                                                                                                                                                                                                                                                                                                                                                                                                                                                                                      |
|---------------------------------|------------------------------------------------------------------------------------------------------------------------------------------------------------------------------------------------------------------------------------------------------------------------------------------------------------------------------------------------------------------------------------------------------------------------------------------------------------------------------------------------------------------------------------------------------------------------------------------------------|
| Journal:                        | <i>BMJ Open</i>                                                                                                                                                                                                                                                                                                                                                                                                                                                                                                                                                                                      |
| Manuscript ID                   | bmjopen-2020-047348.R1                                                                                                                                                                                                                                                                                                                                                                                                                                                                                                                                                                               |
| Article Type:                   | Original research                                                                                                                                                                                                                                                                                                                                                                                                                                                                                                                                                                                    |
| Date Submitted by the Author:   | 22-May-2021                                                                                                                                                                                                                                                                                                                                                                                                                                                                                                                                                                                          |
| Complete List of Authors:       | Lu, Han; Peking University School of Nursing<br>Hou, Luoya; Peking University School of Nursing<br>Zhou, Weijiao; University of Michigan School of Nursing<br>Shen, Liqiong; Wuhan University Zhongnan Hospital<br>Jin, Shida; Peking University School of Nursing<br>Wang, Mengqi; Peking University School of Nursing<br>Shang, Shaomei; Peking University School of Nursing<br>Cong, Xiaomei; University of Connecticut School of Nursing,<br>Jin, Xiaoyan; Peking University School of Nursing<br>Dou, Dou; National Natural Science Foundation of China, Forth<br>Department of Health Sciences |
| <b>Primary Subject Heading</b>: | Health policy                                                                                                                                                                                                                                                                                                                                                                                                                                                                                                                                                                                        |
| Secondary Subject Heading:      | Nursing, Medical education and training                                                                                                                                                                                                                                                                                                                                                                                                                                                                                                                                                              |
| Keywords:                       | Health policy < HEALTH SERVICES ADMINISTRATION & MANAGEMENT, MEDICAL EDUCATION & TRAINING, Organisation of health services < HEALTH SERVICES ADMINISTRATION & MANAGEMENT, Human resource management < HEALTH SERVICES ADMINISTRATION & MANAGEMENT                                                                                                                                                                                                                                                                                                                                                    |
|                                 |                                                                                                                                                                                                                                                                                                                                                                                                                                                                                                                                                                                                      |

SCHOLARONE™  
Manuscripts

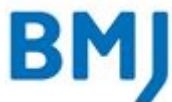

I, the Submitting Author has the right to grant and does grant on behalf of all authors of the Work (as defined in the below author licence), an exclusive licence and/or a non-exclusive licence for contributions from authors who are: i) UK Crown employees; ii) where BMJ has agreed a CC-BY licence shall apply, and/or iii) in accordance with the terms applicable for US Federal Government officers or employees acting as part of their official duties; on a worldwide, perpetual, irrevocable, royalty-free basis to BMJ Publishing Group Ltd ("BMJ") its licensees and where the relevant Journal is co-owned by BMJ to the co-owners of the Journal, to publish the Work in this journal and any other BMJ products and to exploit all rights, as set out in our [licence](#).

The Submitting Author accepts and understands that any supply made under these terms is made by BMJ to the Submitting Author unless you are acting as an employee on behalf of your employer or a postgraduate student of an affiliated institution which is paying any applicable article publishing charge ("APC") for Open Access articles. Where the Submitting Author wishes to make the Work available on an Open Access basis (and intends to pay the relevant APC), the terms of reuse of such Open Access shall be governed by a Creative Commons licence – details of these licences and which [Creative Commons](#) licence will apply to this Work are set out in our licence referred to above.

Other than as permitted in any relevant BMJ Author's Self Archiving Policies, I confirm this Work has not been accepted for publication elsewhere, is not being considered for publication elsewhere and does not duplicate material already published. I confirm all authors consent to publication of this Work and authorise the granting of this licence.

**Trends, Composition, and Distribution of Nurse Workforce in China: A Secondary Analysis of National Data from 2003 to 2018**

Han Lu <sup>\*a</sup>, Luoya Hou<sup>\*a</sup>, Weijiao Zhou<sup>b</sup>, Liqiong Shen<sup>c</sup>, Shida Jin<sup>a</sup>, Mengqi Wang<sup>a</sup>, Shaomei Shang<sup>a</sup>, Xiaomei Cong<sup>d</sup>, Xiaoyan Jin<sup>a</sup>, Dou Dou<sup>c</sup>

<sup>a</sup> Peking University School of Nursing, 38 Xueyuan Rd., Haidian Dist., Beijing, China

<sup>b</sup> University of Michigan School of Nursing, 426 N. Ingalls St. Ann Arbor, MI, USA

<sup>c</sup> Zhongnan Hospital of Wuhan University, 169 Donghu Rd., Wuchang Dist., Wuhan, China

<sup>d</sup> University of Connecticut School of Nursing, 231 Glenbrook Rd., Unit 4026 University of Connecticut Storrs, CT, USA

<sup>e</sup> Department of Health Sciences, National Natural Science Foundation of China, #83 Shuangqing Rd., Beijing, China

\*These authors contributed equally to this work

Corresponding author: Shaomei Shang, Xiaomei Cong, Xiaoyan Jin, Dou Dou

Tel: +86 82801611

E-mail address: shangshaomei@126.com (S. Shang)

**[Authors]:**

1. Han Lu, first author, BS, PhD student, Peking University School of Nursing

Tel: 18811559502

Address: 38 Xueyuan Rd., Haidian Dist., Beijing, China

Email: [luhanfish@163.com](mailto:luhanfish@163.com)

2. Luoya Hou, co-first author, BS, PhD student, Peking University School of Nursing

Tel: 18801238295

Address: 38 Xueyuan Rd., Haidian Dist., Beijing, China

Email: [houluoya@bjmu.edu.cn](mailto:houluoya@bjmu.edu.cn)

3. Weijiao Zhou, MSc, PhD student, University of Michigan School of Nursing

Address: 426 N. Ingalls St. Ann Arbor, MI, USA

Email: [weijiaoz@umich.edu](mailto:weijiaoz@umich.edu)

4. Liqiong Shen, MSc, Zhongnan Hospital of Wuhan University

Address: 169 Donghu Rd., Wuchang Dist., Wuhan, China

Email: [m18510413325@163.com](mailto:m18510413325@163.com)

5. Shida Jin, BS, Master degree student, Peking University School of Nursing

Address: 38 Xueyuan Rd., Haidian Dist., Beijing, China

Email: [jinshida@bjmu.edu.cn](mailto:jinshida@bjmu.edu.cn)

6. Mengqi Wang, BS, Master degree student, Peking University School of Nursing

Address: 38 Xueyuan Rd., Haidian Dist., Beijing, China

Email: [1911210184@bjmu.edu.cn](mailto:1911210184@bjmu.edu.cn)

7. Shaomei Shang, first corresponding author, MSc, Professor & Dean, Peking University School of Nursing

Tel: 13911091935

1  
2  
3 Address: 38 Xueyuan Rd., Haidian Dist., Beijing, China

4 Email: [shangshaomei@126.com](mailto:shangshaomei@126.com)

5  
6 8. Xiaomei Cong, second corresponding author, PhD, Professor & Associate Dean for Research and  
7 Scholarship, University of Connecticut School of Nursing; Director, Nursing Biobehavioral Research  
8 Laboratory (BBL)

9 Address: 231 Glenbrook Rd., Unit 4026 University of Connecticut Storrs, CT, USA

10 Email: [xiaomei.cong@uconn.edu](mailto:xiaomei.cong@uconn.edu)

11  
12  
13 9. Xiaoyan Jin, third corresponding author, MSc, Associate professor, Peking University School of  
14 Nursing

15 Address: 38 Xueyuan Rd., Haidian Dist., Beijing, China

16 Email: [jxybmu@sina.com](mailto:jxybmu@sina.com)

17  
18 10. Dou Dou, fourth corresponding author, PhD, Associate professor, Forth Department of Health  
19 Sciences, National Natural Science Foundation of China

20 Address: 83 Shuangqing Rd., Beijing, China

21 Email: [doudou@nsfc.gov.cn](mailto:doudou@nsfc.gov.cn)

22  
23  
24  
25 **[Number of words]:**

26 A total of 4,351 words in this manuscript.

27  
28  
29  
30 **[Keywords]:** Health Workforce; Nurses; trends; supply and distribution; Healthcare Disparities

## Trends, Composition, and Distribution of Nurse Workforce in China: A Secondary Analysis of National Data from 2003 to 2018

### ABSTRACT

**Objectives** Given the increased aging population and frequent epidemic challenges, it is vital to have the nurse workforce of sufficient quantity and quality. This study aimed to demonstrate the trends, composition, and distribution of nurse workforce in China.

**Design** Secondary analysis using national public datasets in China from 2003 to 2018.

**Setting/Participants** National population, nurse workforce, and physician workforce.

**Primary and secondary outcome measures** Frequency and proportion were used to demonstrate 1) the longitudinal growth of nurse workforce; 2) the diversity of nurse workforce in gender, age, work experience, and education level; and 3) the distribution of nurse workforce among provinces, rural-urban areas, and hospital/community settings. The Gini coefficient and Theil L index were used to measure the inequality trends of nurse workforce.

**Results** The total number of nurses increased from 1.3 million to 4.1 million and the density increased from 1 to 2.94 per 1000 population over 2003-2018. The nurses to physician ratio changed from 0.65:1 to 1.14:1. The majority of the nurse workforce was female, under 35 years old, with less than 30 years of work experience, with an associate's degree, and employed within hospitals. Central and Eastern regions had more nurses and there were 5.08 nurses per 1000 population in urban areas while less than two in rural areas in 2018. The Gini coefficient and between-provincial Theil index experienced a consistent decline. Within-province inequality accounted for overall inequality has risen from 52.38% in 2010 to 71.43% in 2018 suggested that the differences of distribution are mainly reflected in urban and rural areas.

**Conclusion** Chinese nurse workforce has been changed significantly in the past 15 years that may be associated with the reformations of policy, nursing education in China. Our study suggests current features in the nurse workforce and can be used to strengthen future health services.

### Strengths and limitations of this study

1. This study shows the longitudinal growth, the demographic composition, the distribution across urban-rural regions and working settings, and the distribution inequality of the Chinese nurse workforce using the national data over 2003 - 2018.
2. As the effective inequality scales, the Gini coefficient and Theil index were calculated to measure the inequality of nurse workforce distribution in China.
3. This study will provide epidemiologic evidence for policy making, healthcare administration, education, and further research to strengthen the nurse workforce.
4. Limitations based on secondary data analysis also apply to this study.
5. Some nurse composition data are inadequately updated before 2005, and the data collection methods have been constantly modified and updated in the national surveys.

## INTRODUCTION

Nursing is the largest profession in the current health care workforce and healthcare service systems in China and worldwide. Nursing profession has been playing a central role in the health delivery system and providing a full range of responsibilities in health promotion, prevention, treatment, and rehabilitation. There is a large variation of the growth of nursing workforce among different global regions and countries, and nursing shortage as well as other nursing workforce issues have always been a world-wide health service challenge.<sup>[1]</sup> It is vital to have the nurse workforce of sufficient capacity, capability, and quality in achieving population health and universal health coverage. A higher proportion of nurses, especially nurses with a higher education level in the health workforce is associated with better health outcomes.<sup>[2-5]</sup> As the aging population grows heavily globally, as well as the frequent public health emergencies in the past decades, there is an increasing need for safe and quality health care and nurse labor.<sup>[6-8]</sup>

World Health Organization (WHO) evidenced that despite significant progress, there is a growing mismatch between supply, need, and demand of the nurse workforce, resulting in staff shortages.<sup>[9]</sup> And WHO projected a significant growth (55%) of nurse workforce demand, leading to an aggregate number of 32.3 million nurses/midwives by 2030 based on current trends.<sup>[10]</sup> Even in the US, the nursing labor market continues to tighten with 45% of hospitals projecting to increase the number of nurse staff.<sup>[11]</sup>

As a middle-income country, China has been experiencing a very fast pace of the population aging process and has the largest older population: more people are going to need more care for longer. In particular, the degree of aging is showing an unbalanced trend. The proportion of people over 60 years old in rural areas (20.6%) is higher than that in urban areas (16.4%), while rural health resources have been largely underinvested and remain in deficit.<sup>[12]</sup> These disparities lead to heavy healthcare burden in rural areas. Also, the inequality in the distribution of health resources between provinces cannot be ignored owing to the vast territory.<sup>[13]</sup> As a result, China has been facing tremendous challenges regarding the nurse workforce.<sup>[14]</sup>

Over the past two decades, the systems of medical education and health care have undergone unprecedented reform in China. In essence, the educational composition is the reflection of economic structure on the demand for human resources. In 2001, China joined the World Trade Organization, boosting the development of finance. Under that circumstance, with the development of medical science and reform of the healthcare system, the composition of nursing education has made corresponding changes. In 2003, the Ministry of Education in China combined with the other 5 Ministries defined nurses as a critically needed profession.<sup>[15]</sup> To achieve a highly qualified nurse workforce, the government has taken this as a priority in healthcare management. During the 13th Five-Year plan (2016-2020) of China, the main goals of the nursing development have been established to prepare 4.45 million registered nurses or 3.14 nurses per thousand population by 2020.<sup>[16]</sup> As a result of that Five-Year strategic plan, there were almost 4.43 million nurses in China in 2019, which increased by nearly one million from 2016.<sup>[17]</sup>

To date, the nurse workforce has improved significantly through the reform of healthcare system and health education in China. To our knowledge, the research is still lacking to demonstrate the trends of the Chinese nurse workforce from a national perspective. This study analyzed the public data from the *China Health and Family Planning Statistical Yearbooks (CHFPSY)* and *China Statistical*



1  
2  
3 *Yearbooks (CSY)*, illustrating the current nurse workforce and trends of over 2003 to 2018 in China.  
4 Specifically, we examined: 1) the growth of the nurse workforce, 2) the compositions of nurse  
5 workforce, including the diversity in gender, age, work experience, and education level, and 3) the  
6 distribution of nurse workforce across provinces, rural-urban areas, and healthcare settings.  
7  
8  
9

## 10 **METHODS**

### 11 **Study design**

12 A secondary analysis design was used in the study. Data was retrieved from the *CHFPSY* and *CSY*. The  
13 two databases are national annual survey reports reflecting the statistics of the healthcare workforce,  
14 population health status, and economic and social aspects of 31 provinces, autonomous regions, and  
15 municipalities in China (except for Hongkong, Macao, and Taiwan areas). The annual data from 2003  
16 to 2018 from the *CHFPSY* (yearbooks of 2004-2019) were used in analyzing the trends, composition  
17 and distribution of the nurse workforce over the past 15 years. We also used the *CSY* dataset to retrieve  
18 the population data of the national and province levels and calculated the equality/inequality of the  
19 distribution of nursing resources over 2003-2018 in China.  
20  
21  
22  
23

### 24 **Variables and Definitions**

25 The primary variables and definitions included in the data analysis are described as the following,  
26 which are corresponding to the national survey datasets:

- 27 1) Nurses are those who have passed the nurse qualification examination and obtained a nursing  
28 qualification.
- 29 2) Physicians are those who pass a licensing examination and are registered at a healthy authority,  
30 including licensed physicians and licensed physician assistants.
- 31 3) Hospitals include general hospitals, affiliated hospitals of medical college, hospitals specialized in  
32 traditional Chinese medicine, hospitals of integrated traditional Chinese with western medicine,  
33 national hospitals, specialized hospitals, and nursing homes.
- 34 4) Primary care institutions include community health service centers, community health service  
35 stations, urban health centers, township health centers, village clinics, and outpatient departments and  
36 health centers.
- 37 5) The urban areas include municipalities and prefecture-level municipalities.
- 38 6) The rural areas include counties and county-level cities, townships, and villages.
- 39 7) The density of nurses is defined as the number of nurses per 1000 population.  
40  
41  
42  
43  
44  
45

### 46 **Data analysis**

47 We downloaded the data from each of the yearbook datasets from 2004 to 2019, which correspond to  
48 the nurse and population data of 2003-2018. Excel software was used to merge, manage, and analyze  
49 the data. We used frequency and proportion to describe the composition and distributions of the nurse  
50 workforce throughout 2003-2018. The growth rate of nurses was calculated as the annual increased  
51 number of nurses divided by the total number of nurses of the previous year.  
52

53 As for the inequality of nursing distribution, we adopted the Gini coefficient and Theil L index,  
54 which have been proposed by the WHO to describe the inequality of the health workforce and applied  
55 in measuring the health workforce in China and India. [18] The Gini coefficient, an indicator for judging  
56 the degree of equality of distribution according to the Lorenz curve, though not decomposable, is the  
57 most well-known indicator to measure the aggregate level of inequality. We sorted the number of  
58  
59  
60

nurses per 1000 population in each province from small to large, using the cumulative population percentage as the abscissa and using the cumulative percentage of nurses as the ordinate to draw the Lorenz curve of the distribution of nurses across the country by population. The Gini coefficient is twice the area enclosed by the Lorenz curve and the perfect equality line.<sup>[19]</sup> If  $b_i$  = number of nurses in province unit  $i$  and  $c_i$  = number of people in province unit  $i$ , then the total number of nurses in the country is  $B = b_1 + b_2 + \dots + b_n$  and the total number of people in the country is  $C = c_1 + c_2 + \dots + c_n$ . If we value  $B_i = b_i/B$ ,  $C_i = c_i/C$ , then the Gini coefficient  $G = 1 - \sum_{i=1}^I C_i (2 \sum_{i=1}^I B_i - B_i)$ . For further analysis, the Theil L index is the most attractive decomposition indicator, as it can be decomposed into two parts, between-groups ( $T_{1L}$ ) and within-groups ( $T_{2L}$ ), respectively. If  $j$  means urban or rural, then  $B_{ij}$  means the proportion of urban or rural nurses in province unit  $i$  in the total nurses, and  $C_{ij}$  means the proportion of the urban or rural population in province unit  $i$  in the total population. The decomposition of Thiel L index is as follows:

$$\text{Theil L} = T_{1L} + T_{2L} = \sum_{i=1}^I C_i \log \frac{C_i}{B_i} + \sum_{i=1}^I C_i \sum_{j=1}^J C_{ij} \log \frac{C_{ij}}{B_{ij}}$$

This study calculated the Gini coefficient and Theil L index to estimate the level of equality among nurse distribution and they were all weighted by the proportion of the population in each province in the total population as we explained in the formula. Besides, we calculated the ratio of the provincial Theil index to the total Theil index to represent the contribution rate of urban-rural differences to total differences.<sup>[20]</sup> The Gini coefficient and Theil L value from 0 to 1. The smaller value means fairer nurse distribution. We use Microsoft Excel 2013 to perform the above analyses.

### Patient and Public Involvement

A few nurses were involved in the reporting of our research and gave suggestions on the content and presentation of our research.

## RESULTS

### Growth of Nurse Workforce

Over 15 years, the nurse workforce has grown dramatically in China. At the end of 2018, the number of nurses reached over four million, which is 2.2 times more than that in 2003. The density of nurses increased by 1.9 times in the same period to reach about 2.94 nurses per 1000 population in 2018 (Table 1 and Figure 1). In Figure 2, the growth rates of the nurse workforce reveal three segments: an initial period of growth (2003-2006), a rapid growth period (2007-2013), and a period of stable growth (2014-2018). In the initial growth period, the growth rate dramatically increased from 1.6 percent in 2003 to 5.7 percent in 2006. The rapid growth period began in 2007 (9.3%), declined slightly in 2008 and 2011, then rose and reached the highest growth rate (11.5%) in 2013. Since 2014, there was a stable growth rate ranged from 7.7 percent to 8.5 percent.

Meanwhile, we also compared nurses vs. physician workforce in China (Table 1). In a long period of history before 2014, China had been with more physicians than nurses (Figure 1). With the rapid expansion of the nursing staff, the imbalance of nurses and physicians has been changed, and the ratio of nurses to physicians changed from 0.65:1 in 2003 to 1.14:1 in 2018.

1  
2  
3  
4  
5  
6  
7  
8  
9  
10  
11  
12  
13  
14  
15  
16  
17  
18  
19  
20  
21  
22  
23  
24  
25  
26  
27  
28  
29  
30  
31  
32  
33  
34  
35  
36  
37  
38  
39  
40  
41  
42  
43  
44  
45  
46  
47  
48  
49  
50  
51  
52  
53  
54  
55  
56  
57  
58  
59  
60

For peer review only

**Table 1. Change of nurse and physician workforce from 2003 to 2018**

| Year | Nurses  |          | Physicians |          |
|------|---------|----------|------------|----------|
|      | Number  | Density* | Number     | Density* |
| 2003 | 1265959 | 1.00     | 1942364    | 1.54     |
| 2004 | 1308433 | 1.03     | 1999457    | 1.57     |
| 2005 | 1349589 | 1.03     | 2042135    | 1.56     |
| 2006 | 1426339 | 1.09     | 2099064    | 1.60     |
| 2007 | 1558822 | 1.18     | 2122925    | 1.61     |
| 2008 | 1678091 | 1.2      | 2201904    | 1.66     |
| 2009 | 1854818 | 1.39     | 2329206    | 1.75     |
| 2010 | 2048071 | 1.53     | 2413259    | 1.80     |
| 2011 | 2244020 | 1.66     | 2466094    | 1.82     |
| 2012 | 2496599 | 1.85     | 2616064    | 1.94     |
| 2013 | 2783121 | 2.04     | 2794754    | 2.04     |
| 2014 | 3004144 | 2.20     | 2892518    | 2.12     |
| 2015 | 3241469 | 2.37     | 3039135    | 2.22     |
| 2016 | 3507166 | 2.54     | 3191005    | 2.31     |
| 2017 | 3804021 | 2.74     | 3390034    | 2.44     |
| 2018 | 4098630 | 2.94     | 3607156    | 2.59     |

Note: \*Per 1000 population.

### Nurse Demographics and Characteristics

Table 2 presents nurse demographics and characteristics in overall health institutions, hospitals, and primary care institutions in China between 2005 and 2018 (no data available before 2005). The nurse workforce in China has been always predominately female, with the proportion of male nurses slightly increased from 1.7% in 2005 to 2.3% in 2018. Figure 3 shows the different composition of male nurses in hospitals vs. primary care institutions. From 2005 to 2018, male nurses working in primary care institutions dropped to 1.3%, while the proportion in hospitals steadily rose from 1.6 to 2.7%.

**Table 2. Demographics and characteristics of nurses from 2005 to 2018**

| Year                     | Overall health institutions |      |      |      | Hospitals |      |      |      | Primary care institutions* |      |      |      |
|--------------------------|-----------------------------|------|------|------|-----------|------|------|------|----------------------------|------|------|------|
|                          | 2005                        | 2010 | 2015 | 2018 | 2005      | 2010 | 2015 | 2018 | 2005                       | 2010 | 2015 | 2018 |
| <b>Gender</b>            |                             |      |      |      |           |      |      |      |                            |      |      |      |
| Male                     | 1.7                         | 1.7  | 2.0  | 2.3  | 1.6       | 1.8  | 2.2  | 2.7  | 2.3                        | 1.5  | 1.3  | 1.3  |
| Female                   | 98.3                        | 98.3 | 98.0 | 97.7 | 98.4      | 98.2 | 97.8 | 97.3 | 97.7                       | 98.5 | 98.7 | 98.7 |
| <b>Age</b>               |                             |      |      |      |           |      |      |      |                            |      |      |      |
| under 25                 | 10.1                        | 14.1 | 14.1 | 9.7  | 10.2      | 14.7 | 15.0 | 9.7  | 9.1                        | 12.3 | 12.0 | 9.0  |
| 25~34                    | 40.3                        | 39.6 | 46.8 | 50.6 | 38.2      | 39.0 | 48.8 | 53.1 | 52.6                       | 42.5 | 39.9 | 42.7 |
| 35~44                    | 31.6                        | 26.9 | 22.0 | 22.1 | 32.7      | 26.6 | 19.9 | 20.6 | 25.6                       | 30.1 | 31.6 | 28.7 |
| 45~54                    | 17.3                        | 16.9 | 14.0 | 12.7 | 18.1      | 17.6 | 13.7 | 12.1 | 12.1                       | 13.4 | 14.7 | 16.3 |
| 55~59                    | 0.6                         | 2.2  | 2.0  | 3.4  | 0.6       | 2.0  | 1.9  | 3.4  | 0.5                        | 1.5  | 1.4  | 2.7  |
| 60 or above              | 0.1                         | 0.4  | 1.1  | 1.5  | 0.1       | 0.2  | 0.7  | 1.1  | 0.1                        | 0.2  | 0.4  | 0.6  |
| <b>Work</b>              |                             |      |      |      |           |      |      |      |                            |      |      |      |
| <b>Experience(years)</b> |                             |      |      |      |           |      |      |      |                            |      |      |      |
| under 5                  | 14.1                        | 23.6 | 29.7 | 21.3 | 14.0      | 24.3 | 31.4 | 21.7 | 14.3                       | 21.1 | 25.8 | 19.5 |
| 5~9                      | 19.4                        | 16.2 | 24.1 | 31.2 | 17.5      | 16.5 | 24.8 | 32.5 | 30.2                       | 13.8 | 21.0 | 27.2 |
| 10~19                    | 35.9                        | 29.1 | 20.6 | 23.9 | 36.3      | 27.2 | 19.1 | 23.7 | 35.0                       | 39.0 | 25.8 | 23.6 |
| 20~29                    | 22.7                        | 21.8 | 16.7 | 14.3 | 23.8      | 22.8 | 16.1 | 13.1 | 16.6                       | 18.9 | 20.5 | 21.4 |
| 30 or above              | 7.7                         | 9.3  | 8.8  | 9.3  | 8.3       | 9.3  | 8.5  | 9.1  | 3.9                        | 7.2  | 6.9  | 8.3  |
| <b>Education</b>         |                             |      |      |      |           |      |      |      |                            |      |      |      |
| Master's or above        | 0.0                         | 0.1  | 0.1  | 0.2  | 0.0       | 0.1  | 0.2  | 0.2  | 0.0                        | 0.0  | 0.0  | 0.0  |
| Bachelor's               | 2.7                         | 8.7  | 14.5 | 20.8 | 3.2       | 10.5 | 16.7 | 23.5 | 0.4                        | 2.6  | 6.9  | 13.4 |
| Associate's              | 28.9                        | 42.5 | 47.9 | 48.9 | 31.8      | 45.5 | 50.3 | 50.4 | 14.1                       | 32.8 | 39.9 | 44.4 |
| Vocational education     | 60.4                        | 46.0 | 36.3 | 29.6 | 57.7      | 41.5 | 31.9 | 25.5 | 73.9                       | 60.4 | 51.2 | 41.1 |
| High school or below     | 7.9                         | 2.7  | 1.1  | 0.6  | 7.3       | 2.5  | 1.0  |      | 11.6                       | 4.2  | 2.0  | 1.1  |
|                          |                             |      |      |      |           |      |      | 0.5  |                            |      |      |      |

Note: \*Estimated by authors based on demographics data of community health service stations and township health centers.

Young nurses are the main force of the nurse workforce in China. Employees under 35-year-old were accounted for 60.3% of the total nurses in 2018. In table 2, the proportion of nurses between the age of 25 and 34 and those over 55-year-old increased during 2005-2018, whereas the proportion of nurses between 35 and 54 declined slightly. Moreover, the proportion of nurses between 25-34 years old grew gradually in hospital settings but decreased in the primary care institutions across the 15 years. In 2018, there were more young nurses (under 35) in hospitals than primary care institutions.

The nurses' educational levels have changed over time with an increased proportion of the higher level of degrees. The percentage of nurses with a vocational education degree or below dropped year by year, from 74.4% in 2002 to 30.2% in 2018. Associate's degree nurses have become the main force of registered nurses in China, accounting for 48.9% in 2018. The growth of nurses with bachelor's, master's, or Ph.D. degree was fast over the period. By the end of 2018, the proportion of nurses with a

1  
2  
3 bachelor's degree or above have reached 21.0%. Compared with primary care settings, hospitals had  
4 more nurses with higher education levels.  
5

6 The proportion of experienced nurses who were serving more than 30 years was relatively small  
7 in China nurse workforce. The proportion of nurses with 10-29 years' work experience has decreased  
8 continually (58.6% in 2005 to 38.2% in 2018), while the percentage of nurses with less than 10 years'  
9 experience increased (33.5% in 2005 to 52.5% in 2018). A similar trend was shown overtime for the  
10 distribution of nurse working experience in the hospital and primary care settings, but more hospital  
11 nurses had less than 10 years' work experience, and more primary care nurses were with more than 20  
12 years' work experience.  
13  
14  
15

### 16 **Distribution across Provinces, Rural-Urban Areas, and Settings**

17 We adopted the latest data of 2018 to analyze the nurse distribution among different provinces in  
18 China. The density of nurses in each of the provinces and areas ranged from approximately a high of  
19 5.0 nurses in Beijing to a low of 1.6 nurses per 1000 population in Tibet. Figure 4 shows that the  
20 provinces in the Northeastern and Western regions had a relatively low density of the nurse workforce,  
21 whereas provinces in the Central and Eastern regions tended to have a high nurse per capital supply.  
22  
23

24 As for the urban-rural distribution of nurses in China, the criteria used in the datasets for dividing  
25 urban and rural areas before 2010 were different from those for the recent years, therefore we used the  
26 data from 2010 to 2018 for analysis. The data shows that there were large differences between urban  
27 and rural areas. In 2010, there were more than three nurses per 1000 population in urban areas, while  
28 there was less than one nurse per 1000 population among rural areas. Over the past decade, the number  
29 and density of nurses in both urban and rural areas have greatly increased, but the gap between urban  
30 and rural areas has not been narrowed. By 2018, there were 5.08 nurses per 1000 population in urban  
31 areas, while the number of that in rural areas was still less than two (Supplementary file).  
32  
33

34 In 2018, the majority of nurses (73.70%) were employed within hospital settings, and only about  
35 20% of nurses worked in primary care institutions (see Figure 5). Over the past ten years, there was a  
36 tendency that more patients went to hospitals rather than primary care institutions (Supplementary file).  
37 Hospitals received more than 70% of inpatients and 40% of overall outpatient visits, and primary  
38 health care institutions were responsible for over 50% of the visits and 20% of inpatients. During the  
39 last decade, although the number of nurses working in all institutions has increased significantly, the  
40 distribution of nurses across settings had no significant changes.  
41  
42

43 To further examine the distribution of equality of the nurse workforce, we calculated the Gini  
44 coefficient and Theil L index. Although the analyses were based on the provincial data, due to the lack  
45 of valid individual residential data, the results demonstrated significance for understanding the  
46 distribution across provinces and between the urban and rural areas over the country. The Gini  
47 coefficient of nurses fell from 0.167 in 2010 to 0.119 in 2018. Between-provincial Theil index had  
48 similar trends to the corresponding Gini index, dropped from 0.010 in 2010 to 0.004 in 2018. Overall  
49 and within-provincial Theil index experienced a decline from 2010 to 2015 and has risen again in the  
50 past three years. Within-province inequality accounted for overall inter-provincial inequality has risen  
51 consistently, with a peak in 2018 (Theil L: from 52.38% in 2010 to 71.43% in 2018) (Supplementary  
52 file).  
53  
54  
55  
56  
57  
58  
59  
60

## DISCUSSION

Understanding the nurse workforce trends, composition, and distribution of supply is crucial for building an effective health care system. The current study presents national data with longitudinal and recent status on the nurse workforce in China from 2003 to 2018. To the best of our knowledge, this is the first study to report trends of the nurse workforce on a large scale, national level, and over the past 15 years of period. As in many ways, the nursing human resources and education, and health and family policy all impact each other,<sup>[21]</sup> the results of the analysis in this article can be used for policy making, health care administration, education, and further research to strengthen nurse workforce.

The number of Chinese nurse workforce in 2017 (3.8 million) accounted for 18 percent of the nurse workforce in the world (20.7 million), and this number increased to 4.1 million in 2018.<sup>[22]</sup> The Chinese nurses per 1000 population were 2.94 in 2018, exceeding the minimum standard set by WHO (two nurses per 1000 populations) and some developing countries (e.g. India and South Africa), yet this density is still relatively below the average density of Organization for Economic Co-operation and Development (OECD) member countries (nine nurses per 1000 populations and 50% of WHO Member States in 2017.<sup>[22, 23]</sup> The ratio of nurses to physicians is another widely used indicator to show nurse supply. The trends in the number of physicians and nurses in Figure 1 indicate intuitive changes in the ratio of nurses to physicians in the past 15 years. The size of physicians over nurses had been consistently large in China until the changes occurred in 2014, for the first time, the problem of an inverted ratio of doctors to nurses was reversed. The larger size of physicians over nurses during a long period of history in China is associated with many factors and one of the reasons may be related to the duties and responsibilities of nurses and physicians different from other countries.<sup>[24]</sup> Physicians in China have been responsible for some patient care, which may be taken charge of by nurses in other countries.

Besides, we found that changes in growth rates of the nurse workforce were highly associated with policy shifts. In 2003, The Chinese Ministry of Education and the Ministry of Health issued the policies highlighting the nursing shortage, encouraging higher nursing education, and addressing the development of community health services,<sup>[15]</sup> as such, our data shows a milestone for the growth of nurse workforce at that period. In 2008, the healthcare system reform began in China, aimed to strengthen the nurse workforce, which was another significant impact on nursing growth.<sup>[25]</sup> In 2011, the Ministry of Education of the People's Republic of China issued a document to set nursing as a first-level discipline independent of clinical medicine admissions.<sup>[26]</sup> The number of nursing colleges and nursing programs has increased steadily, ensuring a rapid increase in the number of nurses.<sup>[27]</sup> Although the initial implementation of health care reform policy and the global financial crisis may affect the growth rate slightly in 2008, nurses' numbers were in a period of rapid growth, which brings about the number of nurses surpassed the number of physicians for the first time in 2014. In recent years, the support of national policies, and the increase in specialist nurses' training programs and bases increased the social recognition and attractiveness of nursing positions. Accordingly, a certain number of outstanding talents for Chinese nursing were attracted. However, the ratio of nurses to physicians is still not adequately balanced compared with many developed and developing countries worldwide.<sup>[1]</sup> Given that, along with an increasingly severe aging population and frequent epidemic challenges, it is vital to adopt effective policies attracting more talents to enter nursing practice.



1  
2  
3  
4 Growing and developing a more diverse and sustainable nursing workforce in China is still  
5 challenging in achieving the goal of health equity. Female nurses dominate and males (2.3 %) remain  
6 largely underrepresented in the nursing profession in China, in comparison with the proportion of male  
7 nurses in the US (9.6%) and the UK (10.7%), which may be related to different cultures and efforts to  
8 increase the gender diversity in nursing.<sup>[28, 29]</sup> Meanwhile, our finding shows that along with the  
9 increased proportion of male nurses, the nurse workforce in China is slowly becoming more diverse  
10 over time. There is a high demand for male nurses in China, especially after China implemented the  
11 universal two-child policy in 2016. Moreover, male nurses show great advantages in physical strength,  
12 mental toughness, and mechanics sensitivity. Accordingly, Chinese male nurses have better career  
13 prospects and promotion chances compared with female nurses.<sup>[30]</sup> The occupational cognition of male  
14 nurses is also improving in China in recent years.<sup>[31]</sup> Notably, China's nurse workforce has been also  
15 dominated by young and middle-aged nurses, with more than 70% of nurses being 22-44 years old but  
16 the proportion of nurses with more than 30 years of experience consistently below 10%. This  
17 unbalanced composition of age and working experience may result from the continuous nurse shortage  
18 in the past 30 years and rapid expansion in the past decades, for instance, in 1990, China had 1.14  
19 billion people but only fewer than one million nurses. The severe shortage of nurses in the past has led  
20 to a shortage of senior and clinically experienced nurses today, significantly, the proportion of nurses  
21 over 55 years old in China (4.9%) is small, compared to the US (46%) and the UK (19%).<sup>[28, 29]</sup> This is  
22 mainly due to China's retirement policy, where most women retire at the age of 55. In another respect,  
23 the young nurse workforce is an invaluable asset of the health care system in China in addressing the  
24 shortage of nursing and dealing with social health issues. In the period of fighting the COVID-19  
25 epidemic in Wuhan, nurses aged 40 or under accounted for more than 90%, playing a vital role in  
26 fighting the virus. When the policymakers are seeking solutions to overcome the nurse shortage, it is  
27 crucial to consider and develop strategies to retain the nurses in the workforce and extend their career.  
28 Nursing workforce development and retention strategies need to promote different gender, and age and  
29 experience groups of nurses. For instance, research has shown that young nurses are more likely to  
30 leave due to the imbalance between effort and reward, high psychological demands, and elevated job  
31 strain, which suggests that policymakers need to provide young nurses with sufficient social support  
32 and the balance between effort and rewards such as salary, recognition, and career opportunities to  
33 attract and retain young nurses.<sup>[32, 33]</sup>

34  
35  
36 As for the educational level of nurses, our results confirmed that it was not until 2010 the  
37 educational composition of nurses shifted from the main body of vocational education and below  
38 associate's degree and above. Although there is a gradual increase in the proportion of nurses with an  
39 associate degree and bachelor's degree or above, there is still a gap between China and developed  
40 countries.<sup>[28, 29]</sup> There was only 2.7% of nurses who have received a bachelor's degree in 2005. The  
41 main reason for the low percentage was that undergraduate nursing education had not re-started until  
42 1983 with over twenty years of break in China.<sup>[34]</sup> However, as of 2006, a total of 192 colleges and  
43 universities across the country enrolled nursing undergraduates, with more than 20,000 students  
44 enrolled.<sup>[34]</sup> By 2018, there were over 260 colleges and universities that cultivated nursing  
45 undergraduates, while 21% of nurses obtained a bachelor's degree and above. The evidence that nurses  
46 with higher education contribute greatly to producing high-quality care is strong. Studies report a  
47 significant association between educational level and patient outcomes, including mortality rates.<sup>[4, 35]</sup>



1  
2  
3  
4  
5  
6  
7  
8  
9  
10  
11  
12  
13  
14  
15  
16  
17  
18  
19  
20  
21  
22  
23  
24  
25  
26  
27  
28  
29  
30  
31  
32  
33  
34  
35  
36  
37  
38  
39  
40  
41  
42  
43  
44  
45  
46  
47  
48  
49  
50  
51  
52  
53  
54  
55  
56  
57  
58  
59  
60

<sup>36]</sup> It is urgent to improve the education level of nurses in China. At the policy level, while encouraging the development of advanced nursing education, it is necessary to consider providing a broader career development path for highly educated nurses, so as to attract nurses to pursue high education and retain highly educated nursing talents. In addition, considering that many nurses in China have only received an associate's and vocational education, continuing education needs to be vigorously developed. Potential strategies include providing financial advising, academic advising, and open access to programs (e.g. flexible schedules, and/or online courses).<sup>[37, 38]</sup> Also, a higher education expectation and supportive approaches from the employer may motivate nurses to continue their education.<sup>[37, 39]</sup>

The nurse workforce is lack of diversity and unequally distributed across China. The results demonstrated a substantial variation of nursing resources across geographic and/or economic areas: a high concentration of nurses/providers within urban and/or affluent areas, versus a relative undersupply in rural and/or low-income areas. Such imbalance in the nurse workforce is neither unique to China nor to global nurse providers, which is a worldwide problem for all healthcare professionals.<sup>[40, 41]</sup> By calculating the Gini coefficient and Theil L index, we found that the differences in the distribution of nurses in China are mainly reflected in urban and rural areas, while distribution inequality across provinces was decreasing in recent years. Considering that there are more elderly and children in need of health care reside in rural areas of China, it suggests that in the future, more attention should be paid to the urban-rural gap when focusing on health equity between provinces. In terms of distribution in different settings, the majority of nurses are still employed within the hospitals, despite policies that have aimed to strengthen primary care and shift health services towards the community.<sup>[15, 42]</sup> The proportion of nurses employed in hospitals in China is higher compared with developed countries (e.g., England, Japan, and the US). To address the imbalanced distribution of healthcare professionals, evidence-based interventions/strategies are suggested, including focused recruitment and training, improved living and working environment, and financial and professional incentives.<sup>[43, 44]</sup>

### Limitations

This study is the first to report trends, composition, and distribution of the Chinese nurse workforce over 2003-2018. However, there are some limitations to the study. Firstly, there is no nurse composition data available before 2005 from CHFPSY/CSY, and we haven't found any related data or survey. Despite some data gaps, we used the largest available data which was meant to reflect the latest trends. Secondly, as the data collection methods have been constantly modified and updated in the national surveys, it would have a certain impact on our analysis. A new criterion of urban and rural classification was adopted in 2010, which brought the incomparability of urban-rural distribution over time. In this case, we conduct analysis using data that adopt the latest standards to enhance the comparability of the results across times.

### CONCLUSION

Significant changes in China's nurse workforce have been found over time, such as a great increase in the total number of nurses, improvement in education, and decreasing nurse workforce inequality. These changes might be highly associated with policy reformations and social and economic needs at the national and global levels. Our study also suggests current features in the nurse workforce. Nurses in China are featured with less gender diversity, tend to be younger, and have lower education level

1  
2  
3 compared to developed countries. Findings in our study provide evidence to inform nurse workforce  
4 policy, education, and healthcare services in the future.  
5  
6

7 **Contributors:** HL and LYH are joint first authors. SMS, XMC, XYJ, and DD designed the study. HL,  
8 SDJ, and MQW collected the data. LYH, HL, and WJZ analyzed the data. HL and LYH drafted the  
9 manuscript. LQS and WJZ revised the manuscript. All authors have read and approved the final  
10 manuscript. SMS, XMC, and DD are the study guarantors.  
11

12 **Funding:** This research received no specific grant from any funding agency in the public, commercial  
13 or not-for-profit sectors.  
14

15 **Competing interests:** We have read and understood BMJ policy on declaration of interests and declare  
16 that we have no competing interests.  
17

18 **Patient consent for publication** Not required.  
19

20 **Ethics approval** The data used in this study were publicly available and so ethical approval was not  
21 required for its use.  
22

23 **Data sharing:** The access policy and procedures are available at <https://data.cnki.net/yearbook>.  
24  
25

## 26 REFERENCE

- 27 1. Drennan VM, Ross F. Global nurse shortages-the facts, the impact and action for change. *British*  
28 *medical bulletin* 2019;130(1):25-37. doi: 10.1093/bmb/ldz014
- 29 2. Filip H, Peter VB, Koen DM, et al. The impact of nurse staffing levels and nurse's education on  
30 patient mortality in medical and surgical wards: an observational multicentre study. *BMC*  
31 *health services research* 2019;19(1):1-864. doi: 10.1186/s12913-019-4688-7
- 32 3. Arshia A, Katri V-J, Tytti S-V, et al. Impact of nurse staffing on reducing infant, neonatal and  
33 perinatal mortality rates: Evidence from panel data analysis in 35 OECD countries.  
34 *International journal of nursing sciences* 2020;7(2):161-69. doi:  
35 10.1016/j.ijnss.2020.02.002
- 36 4. Aiken LH, Sloane DM, Bruyneel LMS, et al. Nurse staffing and education and hospital mortality  
37 in nine European countries: a retrospective observational study. *The Lancet*  
38 2014;383(9931):1824-30. doi: 10.1016/S0140-6736(13)62631-8
- 39 5. Arshia A, Tytti S-V. Nurse-staffing level and quality of acute care services: Evidence from cross-  
40 national panel data analysis in OECD countries. *International journal of nursing sciences*  
41 2019;6(1):6-16. doi: 10.1016/j.ijnss.2018.11.010
- 42 6. James SL, Abate D, Abate KH, et al. Global, regional, and national incidence, prevalence, and  
43 years lived with disability for 354 diseases and injuries for 195 countries and territories,  
44 1990–2017: a systematic analysis for the Global Burden of Disease Study 2017. *The Lancet*  
45 2018;392(10159):1789-858. doi: 10.1016/S0140-6736(18)32279-7
- 46 7. Appleby J. Nursing workforce crisis in numbers. *BMJ* 2019;367:l6664-164. doi:  
47 10.1136/bmj.l6664
- 48 8. Scheffler RM, Arnold DR. Projecting shortages and surpluses of doctors and nurses in the OECD:  
49 what looms ahead. *Health economics, policy and law* 2019;14(2):274-90. doi:  
50 10.1017/S174413311700055X  
51  
52  
53  
54  
55  
56  
57  
58  
59  
60

- 1  
2  
3  
4 9. World Health Organization a. Health workforce education and training [Available from:  
5 <https://www.who.int/activities/health-workforce-education-and-training> accessed 03-10  
6 2020.
- 7  
8 10. World Health Organization. Global strategy on human resources for health: Workforce 2030  
9 2016 [Available from: [https://www.who.int/hrh/resources/glob-strat-](https://www.who.int/hrh/resources/glob-strat-hrh_workforce2030.pdf)  
10 [hrh\\_workforce2030.pdf](https://www.who.int/hrh/resources/glob-strat-hrh_workforce2030.pdf) accessed 03-24 2020.
- 11  
12 11. 2020 NSI National Health Care Retention & RN Staffing Report, 2020:1.
- 13  
14 12. Department of Population and Employment Statistics of the National Bureau of Statistics. China  
15 population & employment statistical yearbook 2020, 2020.
- 16  
17 13. Zhou K, Zhang X, Ding Y, et al. Inequality trends of health workforce in different stages of  
18 medical system reform (1985-2011) in China. *Human Resources for Health* 2015;13(1):94.  
19 doi: 10.1186/s12960-015-0089-0
- 20  
21 14. Yang J-S, Hao D-J. Dilemmas for nurses in China. *The Lancet* 2018;392(10141):30-30. doi:  
22 10.1016/S0140-6736(18)31185-1
- 23  
24 15. Ministry of Education of the People's Republic of China. The Ministry of Education and the  
25 Ministry of Health identify vocational colleges to develop nursing specialty areas and  
26 define nurses as talent in shortage. In: China MoEotPsRo, ed. China, 2003.
- 27  
28 16. National Health and Family Planning Commission. National nursing Development Plan (2016-  
29 2020). In: Commission NHaFP, ed., 2016.
- 30  
31 17. National Bureau of Statistics of China. Statistical Communique of the People's Republic of  
32 China on the 2019 National Economic and Social Development 2019 [Available from:  
33 <https://data.cnki.net/yearbook/Single/N2020040350>.
- 34  
35 18. World Health Organization. Measuring health workforce inequalities: methods and application  
36 to China and India. In: World Health Organization, ed., 2010.
- 37  
38 19. Theodorakis PN, Mantzavinis GD, Rrumbullaku L, et al. Measuring health inequalities in  
39 Albania: A focus on the distribution of general practitioners. *Human Resources for Health*  
40 2006;4(1):5-5. doi: 10.1186/1478-4491-4-5
- 41  
42 20. Akita T. Decomposing regional income inequality in China and Indonesia using two-stage  
43 nested Theil decomposition method. *The Annals of Regional Science* 2003;37(1):55-77. doi:  
44 10.1007/s001680200107
- 45  
46 21. Gunn V, Muntaner C, Ng E, et al. The influence of welfare state factors on nursing  
47 professionalization and nursing human resources: A time-series cross-sectional analysis,  
48 2000–2015. *Journal of Advanced Nursing* 2019;75(11):2797-810. doi: 10.1111/jan.14155
- 49  
50 22. World Health Organization b. Health workforce [Available from:  
51 [https://www.who.int/hrh/nursing\\_midwifery/en/](https://www.who.int/hrh/nursing_midwifery/en/). accessed 2020-03-22.
- 52  
53 23. OECD. Health at a Glance 2017: OECD Indicators. Paris, 2017.
- 54  
55 24. Yun H, Jie S, Anli J. Nursing shortage in China: State, causes, and strategy. *Nursing Outlook*  
56 2010;58(3):122-28. doi: 10.1016/j.outlook.2009.12.002
- 57  
58 25. The Central People's Government of the People's Republic of China. Suggestions request for  
59 medical and health system reform 2008 [Available from: [http://www.gov.cn/gzdt/2008-](http://www.gov.cn/gzdt/2008-10/14/content_1120143.htm)  
60 [10/14/content\\_1120143.htm](http://www.gov.cn/gzdt/2008-10/14/content_1120143.htm).

- 1  
2  
3 Disciplines for Degree Awarding and Talent Training (2011) 2011 [Available from:  
4 [http://www.moe.gov.cn/srcsite/A22/moe\\_833/201103/t20110308\\_116439.html](http://www.moe.gov.cn/srcsite/A22/moe_833/201103/t20110308_116439.html) accessed  
5 03-08 2011.  
6
- 7 27. China Academic Degree & Graduate Education Information. Universities list of master of  
8 nursing specialist admissions 2011 [Available from:  
9 <https://www.cdgdc.edu.cn/xwyyjsjyxx/gjjl/szfa/hlss/index.shtml>.  
10
- 11 28. Royal College of Nursing. The UK nursing labour market review 2018, 2019.  
12
- 13 29. Smiley RA, Lauer P, Bienemy C, et al. The 2017 National Nursing Workforce Survey. *Journal*  
14 *of Nursing Regulation* 2018;9(3):S1-S88. doi: 10.1016/S2155-8256(18)30131-5  
15
- 16 30. Zhang H, Tu J. The working experiences of male nurses in China: Implications for male nurse  
17 recruitment and retention. *J Nurs Manag* 2020;28(2):441-49. doi: 10.1111/jonm.12950  
18 [published Online First: 2020/01/08]  
19
- 20 31. Yao X, Cheng G, Yang L. Investigation of professional status and occupational cognition among  
21 male nurses in China *Chinese Nursing Management* 2020;20(8):1232-35.  
22
- 23 32. Hayes, L. J., O'Brien - Pallas, L., Duffield, C., Shamian, J., et al. Nurse turnover: A literature  
24 review - An update. *International Journal of Nursing Studies* 2012; 49(7), 887 - 905. doi:  
25 10.1016/j.ijnurstu.2011.10.001  
26
- 27 33. M. Lavoie-Tremblay, L. O' Brien-Pallas, C. Gelinias, N. Desforges, et al.  
28 Addressing the turnover issue among new nurses from a generational viewpoint.  
29 *Journal of Nursing Management* 2008;16(6):724-733. doi: 10.1111/j.1365-  
30 2934.2007.00828.x  
31
- 32 34. Zheng X. Undergraduate nursing education in Mainland China: overview, opportunities and  
33 challenges. *Chinese Journal of Nursing Education* 2009;6(3):139-41. doi:  
34 10.3761/j.issn.1672-9234.2009.03.017  
35
- 36 35. Aiken LH, Cimiotti JP, Sloane DM, et al. Effects of nurse staffing and nurse education on patient  
37 deaths in hospitals with different nurse work environments. *The Journal of nursing*  
38 *administration* 2012;42(10 ):S10. doi: 10.1097/MLR.0b013e3182330b6e  
39
- 40 36. Cho E, Sloane DM, Kim E-Y, et al. Effects of nurse staffing, work environments, and education  
41 on patient mortality: An observational study. *International Journal of Nursing Studies*  
42 2015;52(2):535-42. doi: 10.1016/j.ijnurstu.2014.08.006  
43
- 44 37. Altmann TK. Registered nurses returning to school for a bachelors degree in nursing: Issues  
45 emerging from a meta-analysis of the research. *Contemporary Nurse* 2011;39(2):256-72.  
46 doi: 10.5172/conu.2011.39.2.256  
47
- 48 38. Rich KL, Nugent KE. A United States perspective on the challenges in nursing education. *Nurse*  
49 *Education Today* 2010;30(3):228-32. doi: 10.1016/j.nedt.2009.10.015  
50
- 51 39. Kovner CT, Djukic M, Jun J, et al. Diversity and education of the nursing workforce 2006–  
52 2016. *Nursing Outlook* 2018;66(2):160-67. doi: 10.1016/j.outlook.2017.09.002  
53
- 54 40. Karan A, Negandhi H, Nair R, et al. Size, composition and distribution of human resource for  
55 health in India: new estimates using National Sample Survey and Registry data. *BMJ open*  
56 2019;9(4):e025979. doi: 10.1136/bmjopen-2018-025979  
57
- 58 41. Ono T, Schoenstein M, Buchan J. Geographic Imbalances in Doctor Supply and Policy  
59 Responses. *OECD Health Working Papers* 2014(69):0\_1.  
60

- 1  
2  
3  
4  
5  
6  
7  
8  
9  
10  
11  
12  
13  
14  
15  
16  
17  
18  
19  
20  
21  
22  
23  
24  
25  
26  
27  
28  
29  
30  
31  
32  
33  
34  
35  
36  
37  
38  
39  
40  
41  
42  
43  
44  
45  
46  
47  
48  
49  
50  
51  
52  
53  
54  
55  
56  
57  
58  
59  
60
42. The Central People's Government of the People's Republic of China. Deepening the medical and health systemt reform 2009 [Available from: [http://www.gov.cn/jrzg/2009-04/06/content\\_1278721.htm](http://www.gov.cn/jrzg/2009-04/06/content_1278721.htm)].
43. MacLeod MLP, Stewart NJ, Kulig JC, et al. Nurses who work in rural and remote communities in Canada: A national survey. *Human Resources for Health* 2017;15(1):34-11. doi: 10.1186/s12960-017-0209-0
44. Wilson NW, Couper ID, De Vries E, et al. A critical review of interventions to redress the inequitable distribution of healthcare professionals to rural and remote areas. *Rural and remote health* 2009;9(2):1060.

### Figures

Figure 1. Trends in the supply of nurses and physicians from 2003 to 2018

Figure 2. The growth rates in the supply of nurses from 2003 to 2018

Figure 3. Change of the proportion of male nurses from 2005 to 2018

Figure 4. Distribution of nurses across provinces in China, 2018

Figure 5. Change of nurse distribution across settings in China from 2010 to 2018

1  
2  
3  
4  
5  
6  
7  
8  
9  
10  
11  
12  
13  
14  
15  
16  
17  
18  
19  
20  
21  
22  
23  
24  
25  
26  
27  
28  
29  
30  
31  
32  
33  
34  
35  
36  
37  
38  
39  
40  
41  
42  
43  
44  
45  
46  
47  
48  
49  
50  
51  
52  
53  
54  
55  
56  
57  
58  
59  
60

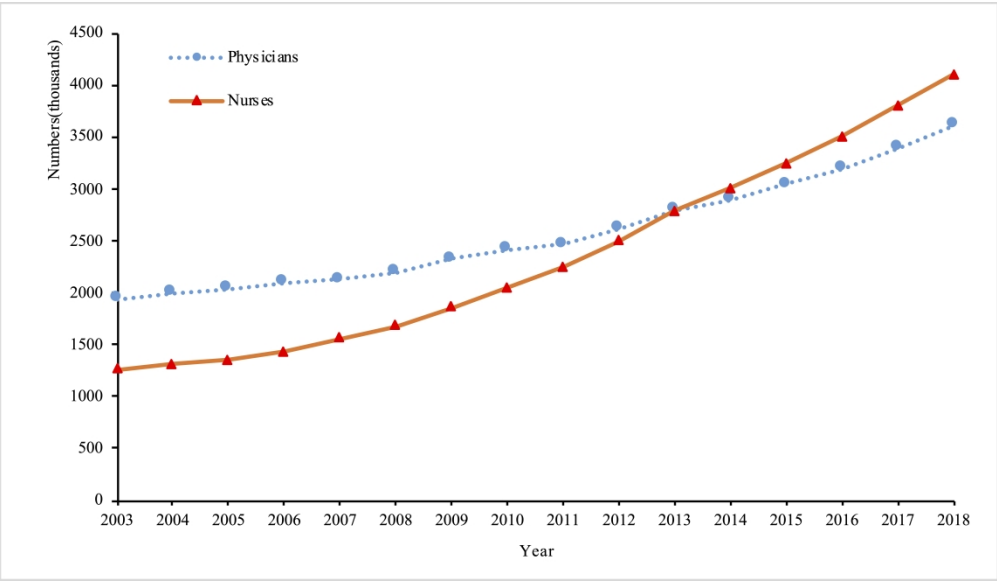

Figure 1. Trends in the supply of nurses and physicians from 2003 to 2018

170x98mm (1200 x 1200 DPI)

1  
2  
3  
4  
5  
6  
7  
8  
9  
10  
11  
12  
13  
14  
15  
16  
17  
18  
19  
20  
21  
22  
23  
24  
25  
26  
27  
28  
29  
30  
31  
32  
33  
34  
35  
36  
37  
38  
39  
40  
41  
42  
43  
44  
45  
46  
47  
48  
49  
50  
51  
52  
53  
54  
55  
56  
57  
58  
59  
60

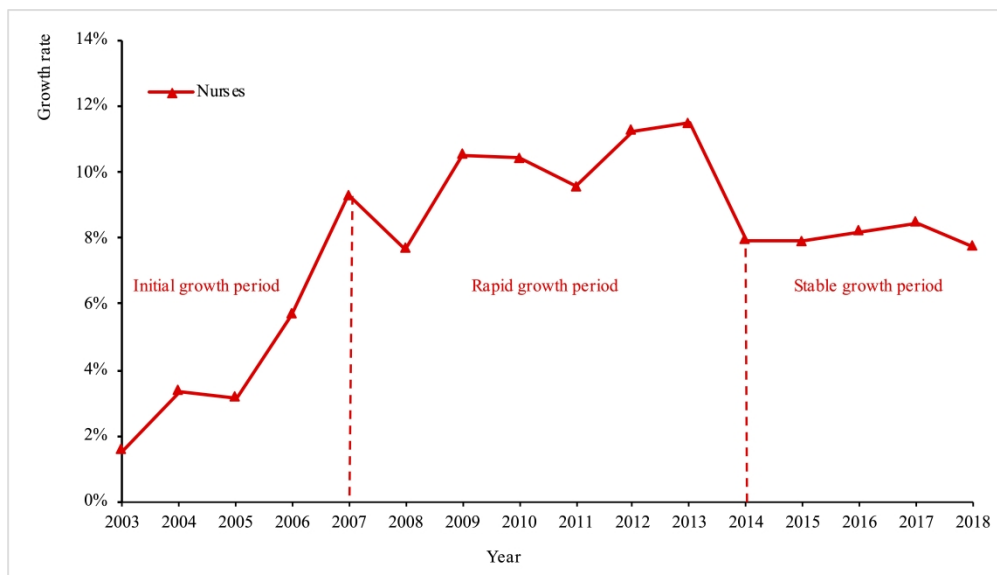

Figure 2. The growth rates in the supply of nurses from 2003 to 2018

161x92mm (1200 x 1200 DPI)

1  
2  
3  
4  
5  
6  
7  
8  
9  
10  
11  
12  
13  
14  
15  
16  
17  
18  
19  
20  
21  
22  
23  
24  
25  
26  
27  
28  
29  
30  
31  
32  
33  
34  
35  
36  
37  
38  
39  
40  
41  
42  
43  
44  
45  
46  
47  
48  
49  
50  
51  
52  
53  
54  
55  
56  
57  
58  
59  
60

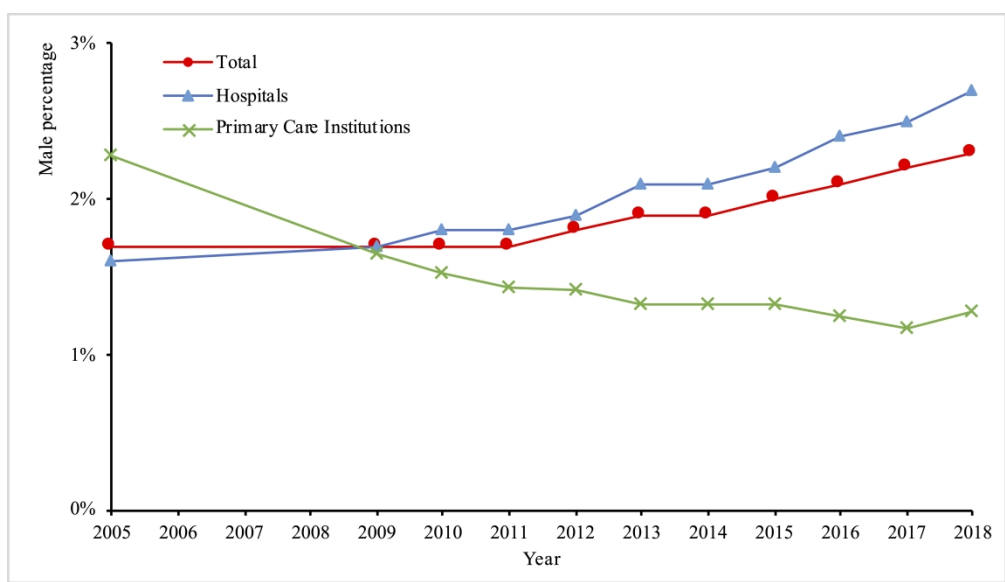

Figure 3. Change of the proportion of male nurses from 2005 to 2018

147x83mm (1200 x 1200 DPI)



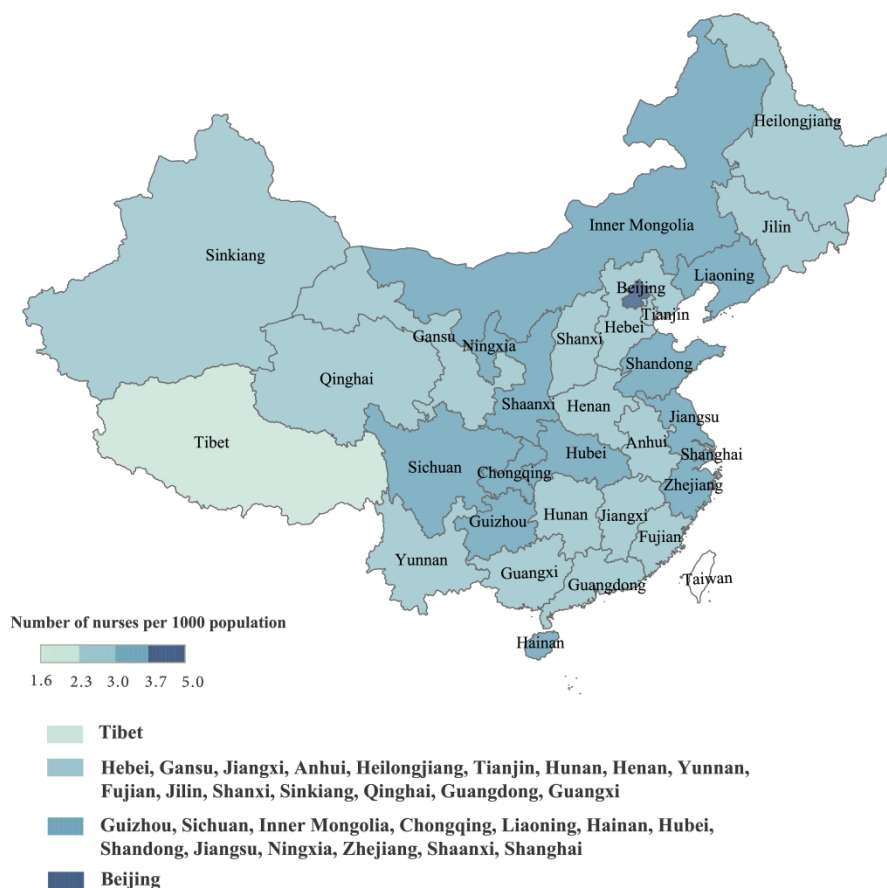

Figure 4. Distribution of nurses across provinces in China, 2018

126x130mm (1200 x 1200 DPI)

1  
2  
3  
4  
5  
6  
7  
8  
9  
10  
11  
12  
13  
14  
15  
16  
17  
18  
19  
20  
21  
22  
23  
24  
25  
26  
27  
28  
29  
30  
31  
32  
33  
34  
35  
36  
37  
38  
39  
40  
41  
42  
43  
44  
45  
46  
47  
48  
49  
50  
51  
52  
53  
54  
55  
56  
57  
58  
59  
60

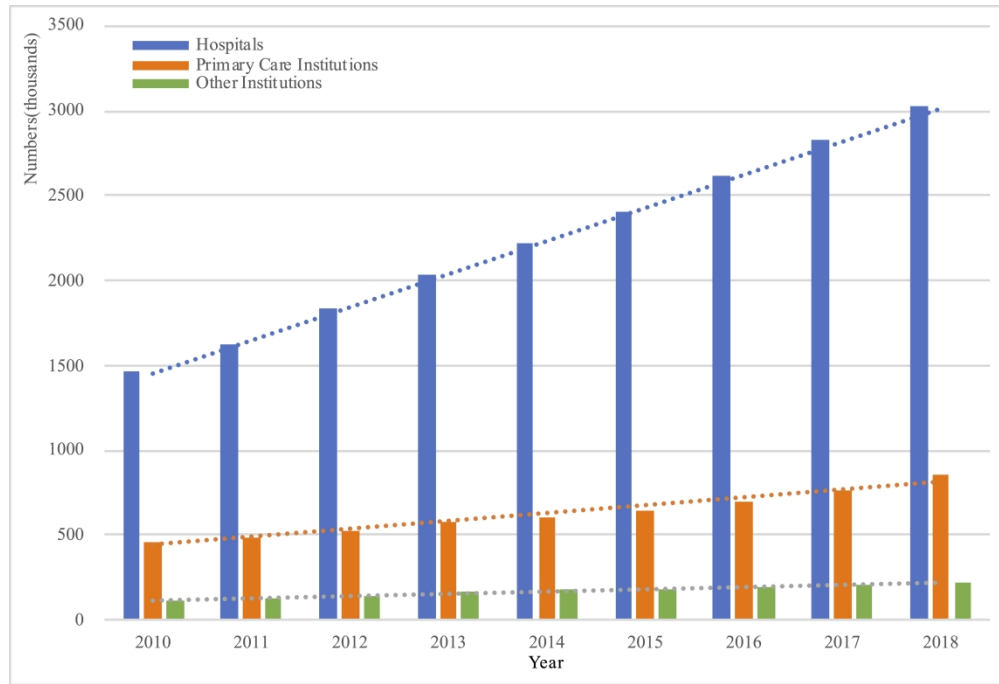

Figure 5. Change of nurse distribution across settings in China from 2010 to 2018

156x106mm (1200 x 1200 DPI)

## SUPPLEMENTAL FILE

**Table A. Urban-rural distribution of nurse workforce from 2010 to 2018**

| Year | Urban   |          | Rural   |          |
|------|---------|----------|---------|----------|
|      | Number  | Density* | Number  | Density* |
| 2010 | 1200343 | 3.09     | 847728  | 0.89     |
| 2011 | 1304202 | 3.29     | 939818  | 0.98     |
| 2012 | 1449513 | 3.65     | 1047086 | 1.09     |
| 2013 | 1603913 | 4.00     | 1179208 | 1.22     |
| 2014 | 1737367 | 4.30     | 1266777 | 1.31     |
| 2015 | 1892835 | 4.58     | 1348634 | 1.39     |
| 2016 | 2063019 | 4.75     | 1444147 | 1.50     |
| 2017 | 2244366 | 5.01     | 1559655 | 1.62     |
| 2018 | 2417653 | 5.08     | 1680977 | 1.80     |

Note: \*Per 1000 population.

**Table B. The number of visits, inpatients and nurses distribution across settings in China from 2010 to 2018**

| Year | Hospitals                                 |         |                              |         |          |         | Primary Care Institutions                 |         |                              |         |          |         | Other Institutions*                       |         |                              |         |          |         |
|------|-------------------------------------------|---------|------------------------------|---------|----------|---------|-------------------------------------------|---------|------------------------------|---------|----------|---------|-------------------------------------------|---------|------------------------------|---------|----------|---------|
|      | Outpatient Visits<br>(10000 person-times) |         | Inpatients<br>(10000 person) |         | Nurses   |         | Outpatient Visits<br>(10000 person-times) |         | Inpatients<br>(10000 person) |         | Nurses   |         | Outpatient Visits<br>(10000 person-times) |         | Inpatients<br>(10000 person) |         | Nurses   |         |
|      | <i>n</i>                                  | percent | <i>n</i>                     | percent | <i>n</i> | percent | <i>n</i>                                  | percent | <i>n</i>                     | percent | <i>n</i> | percent | <i>n</i>                                  | percent | <i>n</i>                     | percent | <i>n</i> | percent |
| 2010 | 203963.3                                  | 34.9%   | 9524                         | 67.2%   | 1468754  | 71.7%   | 361155.6                                  | 61.9%   | 3950                         | 27.9%   | 466503   | 22.8%   | 18642.7                                   | 3.2%    | 700                          | 4.9%    | 112814   | 5.5%    |
| 2011 | 225883.7                                  | 36.0%   | 10755                        | 70.3%   | 1627761  | 72.5%   | 380559.8                                  | 60.7%   | 3775                         | 24.7%   | 492554   | 21.9%   | 20679.1                                   | 3.3%    | 768                          | 5.0%    | 123705   | 5.5%    |
| 2012 | 254161.6                                  | 36.9%   | 12727                        | 71.3%   | 1830202  | 73.3%   | 410920.6                                  | 59.7%   | 4254                         | 23.8%   | 528178   | 21.2%   | 23750.7                                   | 3.4%    | 876                          | 4.9%    | 138219   | 5.5%    |
| 2013 | 274177.7                                  | 37.5%   | 14007                        | 72.9%   | 2041367  | 73.3%   | 432431                                    | 59.1%   | 4300                         | 22.4%   | 576630   | 20.7%   | 24792.3                                   | 3.4%    | 908                          | 4.7%    | 165124   | 5.9%    |
| 2014 | 297207                                    | 39.1%   | 15375                        | 75.2%   | 2222293  | 74.0%   | 436394.9                                  | 57.4%   | 4094                         | 20.0%   | 603900   | 20.1%   | 26584.7                                   | 3.5%    | 972                          | 4.8%    | 177951   | 5.9%    |
| 2015 | 308364.1                                  | 40.1%   | 16087                        | 76.4%   | 2407632  | 74.3%   | 434192.7                                  | 56.4%   | 4036                         | 19.2%   | 646607   | 19.9%   | 26785.7                                   | 3.5%    | 930                          | 4.4%    | 187230   | 5.8%    |
| 2016 | 326955.9                                  | 41.2%   | 17528                        | 77.1%   | 2613367  | 74.5%   | 436663.3                                  | 55.1%   | 4165                         | 18.3%   | 695781   | 19.8%   | 29550.8                                   | 3.7%    | 1035                         | 4.6%    | 198018   | 5.6%    |
| 2017 | 343892.1                                  | 42.0%   | 18915                        | 77.4%   | 2822446  | 74.2%   | 442891.6                                  | 54.1%   | 4450                         | 18.2%   | 769206   | 20.2%   | 31527.3                                   | 3.9%    | 1071                         | 4.4%    | 212369   | 5.6%    |
| 2018 | 357737.5                                  | 43.1%   | 20017                        | 78.6%   | 3020813  | 73.7%   | 440632                                    | 53.0%   | 4376                         | 17.2%   | 852377   | 20.8%   | 32432.2                                   | 3.9%    | 1060                         | 4.2%    | 225440   | 5.5%    |

Note: No data available for primary care institutions before 2010, so we used the data from 2010 to 2018 for analysis. \*Include specialized public health institutions, sanatoriums, clinical laboratory centers, medicinal scientific research institutions, on-job training institutions, health supervision institutions, medical examination centers, rural water improvement centers, talent exchange centers, and statistical information centers, etc.

Table C. Gini coefficient and Theil index of nurse workforce from 2010 to 2018

| Year | Overall inter-provincial |         | Between-provincial | Within-provincial | Within provincial /overall |
|------|--------------------------|---------|--------------------|-------------------|----------------------------|
|      | Gini                     | Theil L | Theil L            | Theil L           | Theil L                    |
| 2010 | 0.167                    | 0.021   | 0.010              | 0.011             | 52.38%                     |
| 2011 | 0.150                    | 0.016   | 0.008              | 0.008             | 50.00%                     |
| 2012 | 0.139                    | 0.015   | 0.008              | 0.007             | 46.67%                     |
| 2013 | 0.133                    | 0.013   | 0.007              | 0.006             | 46.15%                     |
| 2014 | 0.125                    | 0.012   | 0.006              | 0.006             | 50.00%                     |
| 2015 | 0.123                    | 0.012   | 0.006              | 0.006             | 50.00%                     |
| 2016 | 0.121                    | 0.015   | 0.005              | 0.010             | 66.67%                     |
| 2017 | 0.120                    | 0.015   | 0.005              | 0.010             | 66.67%                     |
| 2018 | 0.119                    | 0.014   | 0.004              | 0.010             | 71.43%                     |
