# Supplementary material for: Trends, composition and distribution of nurse workforce in China: a secondary analysis of national data from 2003 to 2018
Source: PubMed Central journal article supplement — BMJ Open. 2021 Oct 27;11(10):e047348. doi: 10.1136/bmjopen-2020-047348 (PMC8552175; doi:10.1136/bmjopen-2020-047348), 2021-10-27
Supplement: bmjopen-2020-047348supp001.pdf [file bmjopen-2020-047348supp001.pdf]

## SUPPLEMENTAL FILE

**Table A. Urban-rural distribution of nurse workforce from 2010 to 2018**

| Year | Urban   |          | Rural   |          |
|------|---------|----------|---------|----------|
|      | Number  | Density* | Number  | Density* |
| 2010 | 1200343 | 3.09     | 847728  | 0.89     |
| 2011 | 1304202 | 3.29     | 939818  | 0.98     |
| 2012 | 1449513 | 3.65     | 1047086 | 1.09     |
| 2013 | 1603913 | 4.00     | 1179208 | 1.22     |
| 2014 | 1737367 | 4.30     | 1266777 | 1.31     |
| 2015 | 1892835 | 4.58     | 1348634 | 1.39     |
| 2016 | 2063019 | 4.75     | 1444147 | 1.50     |
| 2017 | 2244366 | 5.01     | 1559655 | 1.62     |
| 2018 | 2417653 | 5.08     | 1680977 | 1.80     |

Note: \*Per 1000 population.

**Table B. The number of visits, inpatients and nurses distribution across settings in China from 2010 to 2018**

| Year | Hospitals                                 |         |                              |         |          |         | Primary Care Institutions                 |         |                              |         |          |         | Other Institutions*                       |         |                              |         |          |         |
|------|-------------------------------------------|---------|------------------------------|---------|----------|---------|-------------------------------------------|---------|------------------------------|---------|----------|---------|-------------------------------------------|---------|------------------------------|---------|----------|---------|
|      | Outpatient Visits<br>(10000 person-times) |         | Inpatients<br>(10000 person) |         | Nurses   |         | Outpatient Visits<br>(10000 person-times) |         | Inpatients<br>(10000 person) |         | Nurses   |         | Outpatient Visits<br>(10000 person-times) |         | Inpatients<br>(10000 person) |         | Nurses   |         |
|      | <i>n</i>                                  | percent | <i>n</i>                     | percent | <i>n</i> | percent | <i>n</i>                                  | percent | <i>n</i>                     | percent | <i>n</i> | percent | <i>n</i>                                  | percent | <i>n</i>                     | percent | <i>n</i> | percent |
| 2010 | 203963.3                                  | 34.9%   | 9524                         | 67.2%   | 1468754  | 71.7%   | 361155.6                                  | 61.9%   | 3950                         | 27.9%   | 466503   | 22.8%   | 18642.7                                   | 3.2%    | 700                          | 4.9%    | 112814   | 5.5%    |
| 2011 | 225883.7                                  | 36.0%   | 10755                        | 70.3%   | 1627761  | 72.5%   | 380559.8                                  | 60.7%   | 3775                         | 24.7%   | 492554   | 21.9%   | 20679.1                                   | 3.3%    | 768                          | 5.0%    | 123705   | 5.5%    |
| 2012 | 254161.6                                  | 36.9%   | 12727                        | 71.3%   | 1830202  | 73.3%   | 410920.6                                  | 59.7%   | 4254                         | 23.8%   | 528178   | 21.2%   | 23750.7                                   | 3.4%    | 876                          | 4.9%    | 138219   | 5.5%    |
| 2013 | 274177.7                                  | 37.5%   | 14007                        | 72.9%   | 2041367  | 73.3%   | 432431                                    | 59.1%   | 4300                         | 22.4%   | 576630   | 20.7%   | 24792.3                                   | 3.4%    | 908                          | 4.7%    | 165124   | 5.9%    |
| 2014 | 297207                                    | 39.1%   | 15375                        | 75.2%   | 2222293  | 74.0%   | 436394.9                                  | 57.4%   | 4094                         | 20.0%   | 603900   | 20.1%   | 26584.7                                   | 3.5%    | 972                          | 4.8%    | 177951   | 5.9%    |
| 2015 | 308364.1                                  | 40.1%   | 16087                        | 76.4%   | 2407632  | 74.3%   | 434192.7                                  | 56.4%   | 4036                         | 19.2%   | 646607   | 19.9%   | 26785.7                                   | 3.5%    | 930                          | 4.4%    | 187230   | 5.8%    |
| 2016 | 326955.9                                  | 41.2%   | 17528                        | 77.1%   | 2613367  | 74.5%   | 436663.3                                  | 55.1%   | 4165                         | 18.3%   | 695781   | 19.8%   | 29550.8                                   | 3.7%    | 1035                         | 4.6%    | 198018   | 5.6%    |
| 2017 | 343892.1                                  | 42.0%   | 18915                        | 77.4%   | 2822446  | 74.2%   | 442891.6                                  | 54.1%   | 4450                         | 18.2%   | 769206   | 20.2%   | 31527.3                                   | 3.9%    | 1071                         | 4.4%    | 212369   | 5.6%    |
| 2018 | 357737.5                                  | 43.1%   | 20017                        | 78.6%   | 3020813  | 73.7%   | 440632                                    | 53.0%   | 4376                         | 17.2%   | 852377   | 20.8%   | 32432.2                                   | 3.9%    | 1060                         | 4.2%    | 225440   | 5.5%    |

Note: No data available for primary care institutions before 2010, so we used the data from 2010 to 2018 for analysis. \*Include specialized public health institutions, sanatoriums, clinical laboratory centers, medicinal scientific research institutions, on-job training institutions, health supervision institutions, medical examination centers, rural water improvement centers, talent exchange centers, and statistical information centers, etc.

**Table C. Gini coefficient and Theil index of nurse workforce from 2010 to 2018**

| Year | Overall inter-provincial |         | Between-provincial | Within-provincial | Within provincial /overall |
|------|--------------------------|---------|--------------------|-------------------|----------------------------|
|      | Gini                     | Theil L | Theil L            | Theil L           | Theil L                    |
| 2010 | 0.167                    | 0.021   | 0.010              | 0.011             | 52.38%                     |
| 2011 | 0.150                    | 0.016   | 0.008              | 0.008             | 50.00%                     |
| 2012 | 0.139                    | 0.015   | 0.008              | 0.007             | 46.67%                     |
| 2013 | 0.133                    | 0.013   | 0.007              | 0.006             | 46.15%                     |
| 2014 | 0.125                    | 0.012   | 0.006              | 0.006             | 50.00%                     |
| 2015 | 0.123                    | 0.012   | 0.006              | 0.006             | 50.00%                     |
| 2016 | 0.121                    | 0.015   | 0.005              | 0.010             | 66.67%                     |
| 2017 | 0.120                    | 0.015   | 0.005              | 0.010             | 66.67%                     |
| 2018 | 0.119                    | 0.014   | 0.004              | 0.010             | 71.43%                     |
